# Supplementary material for: Finished bacterial genomes from shotgun sequence data
Source: HighWire-hosted journal article supplement (doi:10.1101/gr.141515.112), 2012-07-24
Supplement: SuppMaterial.docx [file SuppMaterial.docx]

**Supplemental Data for Finished bacterial genomes from shotgun sequence data (Ribeiro et al.)**

**Table of contents**

Supplemental Table 1. Sample sources ................................................................................................................................................................... 2

This shows who provided DNA samples.

Supplemental Table 2. Sequence coverage ............................................................................................................................................................ 2

This shows coverage by each of the three data types.

Supplemental Table 3. Coverage by long reads ................................................................................................................................................... 3

This provides a fine-scale view of Pacific Biosciences coverage.

Supplemental Table 4. Coverage by jumping pairs ............................................................................................................................................ 4

This provides a fine-scale view of jumping pair coverage.

(Supplemental Tables 5 and 6)

Placed at end because of their length, see below.

Supplemental Table 7. Corrections to reference sequence for *S. pneumoniae* ....................................................................................... 5

This provides the status of the 63 changes we made to the reference sequence.

Supplemental Table 8. Computational resource usage by assemblies ...................................................................................................... 6

This shows cpu and memory usage for each of the assemblies.

Supplemental Table 9. Assembly results without long reads ....................................................................................................................... 6

This tables shows the outcome of assemblies in which data type B (long reads) are omitted.

Supplemental Figure 1. Coverage as a function of GC content ...................................................................................................................... 7

The coverage of the genome as a function of GC content is exhibited for fragment and jump reads.

Supplemental Figure 2. Manual review of Sanger traces shows systematic errors in phred basecalls (example) ................ 8-9

This details an example of an error in the *S. pneumoniae* reference sequence.

Supplemental Figure 3. Graph assemblies for samples #4-16 ...................................................................................................................... 9-11

This provides a graphical image for each of the non-control assemblies.

Supplemental Methods. Data generation ............................................................................................................................................................... 11-12

This describes the protocols used to generate data for this work.

Supplemental References ............................................................................................................................................................................................. 13

References referred to only in supplemental material.

Supplemental Methods. Assembly algorithm ...................................................................................................................................................... 13-21

Details of the assembly algorithm not provided in the main text. This includes Supplemental Figures 4 and 5.

Supplemental Analysis. Cost model for sequencing, assembling and finishing a bacterial genome ........................................... 22-23

Description of cost models for ‘old’ vs ‘new’ methods of genome finishing.

Supplemental Table 5. Accession information for Illumina data ................................................................................................................ 24-25

Where to find the Illumina data used in this work.

Supplemental Table 6. Accession information for Pacific Biosciences data .......................................................................................... 26-37

Where to find the Pacific Biosciences data used in this work.

**Supplemental Table 1. Sample sources**

| **#** | **Species** | **Subspecies** | **Strain** | **Source** | **Affiliation** |
| --- | --- | --- | --- | --- | --- |
| *1* | *Escherichia coli* |  | K12 MG1655 | Marin Vulic | Dept. of Biology, Northeastern University, Boston MA, USA |
| *2* | *Rhodobacter sphaeroides* |  | 2.4.1 | Louise Williams | Broad Institute, Cambridge MA, USA |
| *3* | *Streptococcus pneumoniae* |  | Tigr4 | Claudette Thompson | Dept. of Epidemiology and Dept. of Immunology & Infectious Diseases,  Harvard School of Public Health, Boston MA, USA |
| *4* | *Bacteroides eggerthii* |  | 1_2_48FAA | Emma Allen-Vercoe | Dept. of Molecular and Cellular Biology, University of Guelph, Guelph Ontario, Canada |
| *5* | *Bacteroides fragilis* |  | CL05T00C42 | Laurie Comstock | Brigham and Women's Hospital, Harvard Medical School, Boston MA, USA |
| *6* | *Bacteroides thetaiotaomicron* |  | CL09T03C10 | Laurie Comstock | Brigham and Women's Hospital, Harvard Medical School, Boston MA, USA |
| *7* | *Bifidobacterium bifidum* |  | NCIMB 41171 | Glenn R. Gibson | Dept. of Food and Nutritional Sciences, University of Reading, Reading, Berkshire, UK |
| *8* | *Coprobacillus* species |  | D6 | Christopher Sibley | Dept. of Microbiology & Infectious Disease, University of Calgary, Calgary, Alberta, Canada |
| *9* | *Enterococcus casseliflavus* |  | EC20 | Janet Manson | Dept. of Ophthalmology, Schepens Eye Research Institute and Harvard Medical School, Boston MA, USA |
| *10* | *Eubacterium* species |  | 3_1_31 | Emma Allen-Vercoe | Dept. of Molecular and Cellular Biology, University of Guelph, Guelph Ontario, Canada |
| *11* | *Fusobacterium nucleatum* | *animalis* | OT 420 | Jacques Izard | Forsyth Institute, Cambridge MA, USA |
| *12* | *Fusobacterium nucleatum* | *animalis* | 7_1 | Emma Allen-Vercoe | Dept. of Molecular and Cellular Biology, University of Guelph, Guelph Ontario, Canada |
| *13* | *Klebsiella oxytoca* |  | 10-5248 | Nancy Taylor and James Fox | Division of Comparative Medicine, Massachusetts Institute of Technology, Cambridge MA, USA |
| *14* | *Neisseria gonorrhoeae* |  | FA19 | H. (Hank) Steven Seifert | Dept. of Microbiology-Immunology, Feinberg School of Medicine, Northwestern Univ., Chicago IL, USA |
| *15* | *Neisseria gonorrhoeae* |  | MS11 | H. (Hank) Steven Seifert | Dept. of Microbiology-Immunology, Feinberg School of Medicine, Northwestern Univ., Chicago IL, USA |
| *16* | *Scardovia wiggsiae* |  | F0424 | Jacques Izard | Forsyth Institute, Cambridge MA, USA |

**Supplemental Table 1**. Sample sources. The table shows the source of each DNA sample used in this study.

**Supplemental Table 2. Amount of sequence used**

|  | **Coverage (x)** | | | **Number of reads (M)** | | | **Number of runs** | | |
| --- | --- | --- | --- | --- | --- | --- | --- | --- | --- |
| **#** | **A**  **Fragment reads** | **B**  **Long reads** | **C**  **Jumping pairs** | **A**  **Fragment reads** | **B**  **Long reads** | **C**  **Jumping pairs** | **A**  **Fragment reads** | **B**  **Long reads** | **C Jumping pairs** |
| 1 | 039.6 | 064.0 | 024.2 | 2.37 | 0.41 | 3.96 | 0.014 | 08 | 0.010 |
| 2 | 053.0 | 205.6 | 040.9 | 8.71 | 1.99 | 3.95 | 0.048 | 13 | 0.006 |
| 3 | 086.0 | 110.4 | 036.6 | 2.13 | 0.40 | 2.32 | 0.001 | 08 | 0.003 |
| 4 | 043.4 | 052.5 | 044.8 | 2.45 | 0.28 | 2.71 | 0.002 | 08 | 0.001 |
| 5 | 040.2 | 051.7 | 070.5 | 2.58 | 0.41 | 5.77 | 0.001 | 13 | 0.006 |
| 6 | 042.6 | 052.5 | 116.2 | 2.62 | 0.48 | 7.38 | 0.001 | 08 | 0.005 |
| 7 | 062.8 | 063.4 | 029.3 | 2.19 | 0.27 | 2.39 | 0.002 | 08 | 0.003 |
| 8 | 049.2 | 065.1 | 083.0 | 2.54 | 0.22 | 3.55 | 0.001 | 04 | 0.001 |
| 9 | 058.1 | 077.8 | 059.4 | 3.18 | 0.58 | 2.53 | 0.001 | 30 | 0.001 |
| 10 | 040.6 | 068.1 | 016.5 | 1.65 | 0.46 | 1.66 | 0.001 | 08 | 0.002 |
| 11 | 091.5 | 099.9 | 090.2 | 2.45 | 0.41 | 2.53 | 0.001 | 17 | 0.002 |
| 12 | 053.1 | 071.6 | 061.8 | 1.80 | 0.32 | 1.83 | 0.001 | 22 | 0.001 |
| 13 | 067.1 | 080.7 | 082.2 | 5.04 | 0.78 | 7.32 | 0.003 | 14 | 0.014 |
| 14 | 074.9 | 128.6 | 055.2 | 3.50 | 0.44 | 1.81 | 0.002 | 14 | 0.001 |
| 15 | 080.3 | 129.1 | 056.2 | 3.72 | 0.62 | 1.88 | 0.002 | 26 | 0.001 |
| 16 | 130.9 | 188.8 | 115.0 | 2.72 | 0.59 | 2.69 | 0.001 | 09 | 0.002 |

**Supplemental Table 2**. Amount of sequence used For each of the three data types described in Table 1, three measures of sequence quantity are given: the sequence coverage of the genome by the data, the number of reads, and the number of runs. Coverage values were estimated by comparing to our assembly of the data, or the reference sequence (for samples #1-3). For data types A (fragment reads) and C (jumping pairs), coverage is computed from the number of Q20 bases in the reads, whereas the number of reads includes all reads (unfiltered). For data type B (long reads), coverage includes only the aligning portion of each read. Reads were first broken at adapter sequences by the Pacific Biosciences pipeline. The read count includes all reads (aligning or not), and is computed after breaking at adapters. For Illumina, the number of runs is computed as a fraction of eight lanes. See Supplemental Table 1 for sample identifiers.

**Supplemental Table 3. Coverage by long reads**

**(a) (b)**

|  | **Number of reads covering window of size** | | | |
| --- | --- | --- | --- | --- |
| **#** | **0 kb** | **1 kb** | **2 kb** | **3 kb** |
| 1 | 64.0 | 13.9 | 2.0 | 0.1 |
| 2 | 205.6 | 13.6 | 0.2 | 0.0 |
| 3 | 110.4 | 13.9 | 0.6 | 0.0 |
| 4 | 52.5 | 24.7 | 10.7 | 4.9 |
| 5 | 51.7 | 11.0 | 1.4 | 0.1 |
| 6 | 52.5 | 9.6 | 0.9 | 0.1 |
| 7 | 63.4 | 6.9 | 0.4 | 0.0 |
| 8 | 65.1 | 30.5 | 11.9 | 4.4 |
| 9 | 77.8 | 12.7 | 1.5 | 0.1 |
| 10 | 68.1 | 11.3 | 1.0 | 0.1 |
| 11 | 99.9 | 17.3 | 1.4 | 0.0 |
| 12 | 71.6 | 14.2 | 1.9 | 0.1 |
| 13 | 80.7 | 16.0 | 1.5 | 0.0 |
| 14 | 128.6 | 28.7 | 4.0 | 0.3 |
| 15 | 129.1 | 32.2 | 5.8 | 0.5 |
| 16 | 188.8 | 23.0 | 1.4 | 0.1 |

|  | **Mean coverage by**  **reads longer than** | | | |
| --- | --- | --- | --- | --- |
| **#** | **0 kb** | **1 kb** | **2 kb** | **3 kb** |
| 1 | 64.0 | 38.2 | 10.6 | 1.5 |
| 2 | 205.6 | 61.2 | 1.6 | 0.0 |
| 3 | 110.4 | 49.4 | 5.2 | 0.1 |
| 4 | 52.5 | 45.5 | 27.6 | 16.6 |
| 5 | 51.7 | 30.6 | 7.8 | 0.9 |
| 6 | 52.5 | 28.2 | 6.1 | 0.5 |
| 7 | 63.4 | 25.1 | 3.0 | 0.1 |
| 8 | 65.1 | 57.0 | 35.6 | 17.4 |
| 9 | 77.8 | 38.2 | 8.6 | 1.5 |
| 10 | 68.1 | 35.0 | 6.4 | 0.6 |
| 11 | 99.9 | 54.1 | 10.2 | 0.3 |
| 12 | 71.6 | 39.1 | 11.0 | 1.4 |
| 13 | 80.7 | 47.1 | 10.0 | 0.8 |
| 14 | 128.6 | 77.8 | 22.4 | 3.4 |
| 15 | 129.1 | 80.8 | 29.2 | 5.0 |
| 16 | 188.8 | 79.4 | 10.0 | 0.5 |

**Supplemental Table 3**. Coverage by long reads (Table 1, data type B). (a): Mean number of long reads covering a window of given size. For each sample, for windows of several lengths, we predicted the number of long reads in the data set that would completely span a window of the given length. (b): For several lengths, we show the coverage of the long reads having length equal to the given value or greater. For (a) and (b), values were estimated by comparing to our assembly of the data, or the reference sequence (for samples #1-3). See Supplemental Table 1 for sample identifiers.

**Supplemental Table 4. Coverage by jumping pairs**

**(a) (b)**

|  | **Number of jumps covering window of size** | | | | | | |
| --- | --- | --- | --- | --- | --- | --- | --- |
| **#** | **0 kb** | **1 kb** | **2 kb** | **3 kb** | **4 kb** | **5 kb** | **6 kb** |
| 1 | 325.5 | 229.2 | 141.0 | 75.3 | 36.7 | 17.1 | 7.9 |
| 2 | 412.2 | 262.1 | 141.0 | 65.1 | 27.3 | 10.9 | 4.3 |
| 3 | 402.9 | 272.2 | 159.2 | 79.4 | 35.9 | 15.6 | 6.8 |
| 4 | 292.7 | 153.5 | 74.5 | 31.5 | 12.1 | 4.3 | 1.3 |
| 5 | 455.6 | 287.5 | 147.7 | 60.2 | 20.7 | 6.3 | 1.7 |
| 6 | 785.2 | 449.3 | 190.8 | 58.4 | 13.5 | 2.5 | 0.5 |
| 7 | 358.2 | 256.1 | 158.2 | 83.6 | 39.6 | 17.5 | 7.6 |
| 8 | 636.9 | 395.8 | 198.3 | 80.6 | 27.9 | 8.3 | 2.2 |
| 9 | 477.4 | 277.9 | 130.7 | 50.4 | 16.7 | 4.9 | 1.3 |
| 10 | 77.2 | 50.5 | 28.1 | 13.4 | 5.9 | 2.5 | 1.1 |
| 11 | 512.6 | 304.2 | 140.5 | 50.7 | 15.3 | 4.1 | 0.8 |
| 12 | 403.6 | 242.6 | 116.5 | 45.8 | 15.7 | 5.0 | 1.4 |
| 13 | 941.8 | 572.7 | 284.9 | 113.7 | 38.5 | 11.6 | 3.3 |
| 14 | 684.8 | 436.3 | 228.4 | 98.5 | 37.2 | 13.1 | 4.3 |
| 15 | 613.2 | 424.4 | 258.3 | 139.2 | 69.4 | 33.0 | 15.2 |
| 16 | 760.6 | 434.6 | 185.1 | 55.6 | 11.9 | 1.8 | 0.2 |

|  | **Mean physical coverage by jumps larger than** | | | | | | |
| --- | --- | --- | --- | --- | --- | --- | --- |
| **#** | **0 kb** | **1 kb** | **2 kb** | **3 kb** | **4 kb** | **5 kb** | **6 kb** |
| 1 | 325.5 | 324.1 | 299.1 | 229.7 | 146.3 | 83.2 | 44.7 |
| 2 | 412.2 | 401.3 | 340.1 | 227.7 | 125.0 | 61.7 | 28.7 |
| 3 | 402.9 | 396.7 | 356.8 | 259.9 | 153.8 | 80.7 | 40.5 |
| 4 | 292.7 | 255.5 | 192.9 | 118.3 | 60.2 | 27.5 | 11.6 |
| 5 | 455.6 | 445.6 | 380.6 | 240.3 | 113.7 | 45.3 | 15.4 |
| 6 | 785.2 | 759.0 | 582.7 | 292.2 | 100.6 | 23.7 | 5.2 |
| 7 | 358.2 | 357.9 | 337.6 | 259.5 | 163.8 | 90.3 | 46.1 |
| 8 | 636.9 | 624.3 | 517.3 | 319.6 | 154.1 | 61.8 | 20.9 |
| 9 | 477.4 | 456.9 | 356.5 | 206.0 | 94.7 | 36.5 | 12.3 |
| 10 | 77.2 | 75.9 | 65.9 | 45.3 | 25.5 | 13.2 | 6.5 |
| 11 | 512.6 | 498.0 | 395.3 | 221.4 | 93.3 | 31.6 | 10.3 |
| 12 | 403.6 | 392.1 | 313.6 | 184.5 | 86.7 | 34.2 | 12.7 |
| 13 | 941.8 | 911.0 | 748.8 | 459.3 | 216.3 | 84.2 | 28.6 |
| 14 | 684.8 | 672.2 | 572.5 | 369.8 | 189.2 | 83.7 | 33.9 |
| 15 | 613.2 | 605.7 | 549.7 | 416.2 | 270.1 | 158.4 | 87.0 |
| 16 | 760.6 | 733.8 | 566.6 | 283.1 | 93.5 | 20.1 | 3.0 |

**Supplemental Table 4**. Coverage by jumping pairs (Table 1, data type C). (a): Mean number of jumps covering a window of given size. For each sample, for windows of several lengths, we predicted the number of jumping pairs in the data set that would completely span a window of the given length. (b): For several lengths, we show the physical coverage of the jumping pairs by those spanning the given length or more. For (a) and (b), values were estimated by comparing to our assembly of the data, or the reference sequence (for samples #1-3). See Supplemental Table 1 for sample identifiers.

**Supplemental Tables 5 and 6 are at the end of this document**

**Supplemental Table 7. Corrections to reference sequence for *S. pneumoniae***

|  |  |  |  |  | **Fragment pairs** | | **Jump pairs** | |
| --- | --- | --- | --- | --- | --- | --- | --- | --- |
| **Event id** | **Coordinate** | **Correction event** | **Manual review of Sanger traces** | **Lab validation** | **Favoring correction** | **Favoring reference** | **Favoring correction** | **Favoring reference** |
| 1 | 87,360 | insertion of 456 bases | supports correction | not done | * | * | 9‡ | 0‡ |
| 2 | 146,054 | G to C | supports correction | supports correction | 357 | 0 | 347 | 1 |
| 3 | 188,292 | deletion of C | supports correction | supports correction | 367 | 0 | 335 | 1 |
| 4 | 192,435 | insertion of C | supports correction | supports correction | 280 | 3 | 332 | 4 |
| 5 | 204,678 | C to T | confirms reference | supports correction | 316 | 0 | 329 | 0 |
| 6 | 247,804 | A to G | supports correction | supports correction | 362 | 0 | 406 | 1 |
| 7 | 273,377 | deletion of G | supports correction | supports correction | 329 | 0 | 360 | 2 |
| 8 | 324,505 | G to A | inconclusive data | supports correction | 315 | 0 | 358 | 0 |
| 9 | 431,222 | T to G | confirms reference | supports mixed type | 180 | 134 | 140 | 144 |
| 10 | 463,629 | G to A | supports correction | supports correction | 228 | 2 | 253 | 7 |
| 11 | 463,630 | A to G | supports correction | supports correction | 226 | 0 | 248 | 4 |
| 12 | 469,287 | deletion of C | supports correction | supports correction | 310 | 0 | 305 | 0 |
| 13 | 476,405 | G to T | supports correction | supports correction | 223 | 1 | 251 | 2 |
| 14 | 486,059 | inversion of 453 bases | confirms reference | not done | * | * | 113‡ | 72‡ |
| 15 | 489,104 | insertion of 1473 bases | inconclusive data | not done | * | * | 92‡ | 6‡ |
| 16 | 489,630 | inversion of 414 bases | confirms reference | not done | * | * | 62‡ | 46‡ |
| 17 | 597,325 | insertion of G | supports correction | supports correction | 288 | 2 | 248 | 4 |
| 18 | 656,387 | insertion of A | supports correction | supports correction | 248 | 1 | 242 | 8 |
| 19 | 730,677 | C to T | inconclusive data | supports correction | 240 | 1 | 274 | 2 |
| 20 | 737,107 | A to G | inconclusive data | supports correction | 294 | 0 | 273 | 2 |
| 21 | 807,983 | G to A | confirms reference | supports correction | 220 | 0 | 276 | 0 |
| 22 | 834,922 | insertion of C | supports correction | supports correction | 89 | 5 | 226 | 5 |
| 23 | 947,166 | G to C | inconclusive data | supports correction | 234 | 0 | 268 | 5 |
| 24 | 967,256 | G to T | inconclusive data | supports correction | 192 | 1 | 198 | 8 |
| 25 | 972,509 | deletion of T | inconclusive data | supports correction | 187 | 0 | 185 | 0 |
| 26 | 985,055 | deletion of T | inconclusive data | supports correction | 241 | 0 | 299 | 1 |
| 27 | 991,106 | insertion of C | supports correction | supports correction | 260 | 1 | 261 | 4 |
| 28 | 1,001,703 | T to G | confirms reference | supports correction | 217 | 1 | 234 | 2 |
| 29 | 1,096,816 | T to G | inconclusive data | supports correction | 249 | 0 | 219 | 2 |
| 30 | 1,101,584 | C to G | supports correction | supports correction | 226 | 0 | 188 | 2 |
| 31 | 1,101,585 | G to C | supports correction | supports correction | 225 | 0 | 185 | 2 |
| 32 | 1,113,285 | insertion of C | supports correction | supports correction | 208 | 8 | 234 | 10 |
| 33 | 1,127,019 | C to G | supports correction | supports correction | 234 | 3 | 233 | 4 |
| 34 | 1,127,020 | G to C | supports correction | supports correction | 236 | 1 | 238 | 5 |
| 35 | 1,132,343 | insertion of G | supports correction | supports correction | 46 | 0 | 196 | 3 |
| 36 | 1,132,391 | insertion of G | supports correction | supports correction | 28 | 0 | 163 | 8 |
| 37 | 1,132,434 | G to A | supports correction | supports correction | 65 | 0 | 190 | 4 |
| 38 | 1,132,435 | A to G | supports correction | supports correction | 65 | 0 | 185 | 5 |
| 39 | 1,257,185 | G to T | confirms reference | supports correction | 221 | 0 | 278 | 0 |
| 40 | 1,267,218 | C to G | supports correction | supports correction | 184 | 0 | 247 | 1 |
| 41 | 1,267,219 | G to C | supports correction | supports correction | 182 | 0 | 249 | 2 |
| 42 | 1,282,010 | insertion of G | supports correction | supports correction | 240 | 3 | 230 | 4 |
| 43 | 1,320,528 | C to A | confirms reference | supports correction | 256 | 0 | 286 | 1 |
| 44 | 1,350,620 | G to T | inconclusive data | supports correction | 349 | 1 | 346 | 1 |
| 45 | 1,543,555 | C to A | confirms reference | inconclusive | 286 | 13 | 315 | 16 |
| 46 | 1,618,222 | A to G | supports correction | supports correction | 271 | 0 | 257 | 3 |
| 47 | 1,618,514 | insertion of G | supports correction | supports correction | 244 | 0 | 331 | 2 |
| 48 | 1,622,020 | G to A | supports correction | supports correction | 265 | 0 | 306 | 3 |
| 49 | 1,622,021 | A to G | supports correction | supports correction | 261 | 0 | 304 | 2 |
| 50 | 1,622,065 | G to A | supports correction | supports correction | 262 | 1 | 249 | 4 |
| 51 | 1,622,066 | A to G | supports correction | supports correction | 255 | 2 | 250 | 3 |
| 52 | 1,674,302 | deletion of C | confirms reference | supports correction | 223 | 10 | 263 | 17 |
| 53 | 1,695,199 | insertion of T | confirms reference | supports correction | 259 | 2 | 308 | 3 |
| 54 | 1,696,085 | insertion of C | supports correction | supports correction | 286 | 9 | 253 | 10 |
| 55 | 1,759,030 | deletion of A | supports correction | supports correction | 318 | 0 | 344 | 3 |
| 56 | 1,828,205 | G to T | confirms reference | supports correction | 308 | 0 | 406 | 2 |
| 57 | 1,862,984 | C to T | confirms reference | supports correction | 334 | 0 | 323 | 0 |
| 58 | 1,985,217 | insertion of G | supports correction | supports correction | 270 | 3 | 320 | 9 |
| 59 | 2,016,330 | insertion of G | supports correction | supports correction | 199 | 4 | 314 | 5 |
| 60 | 2,042,323 | G to A | confirms reference | supports correction | 305 | 0 | 370 | 1 |
| 61 | 2,092,070 | insertion of 568 bases | inconclusive data | not done | * | * | 19‡ | 0‡ |
| 62 | 2,050,193 | deletion of GTTTTT | confirms reference | supports correction | 197 | 47 | 242 | 8 |
| 63 | 2,127,996 | G to T | confirms reference | supports correction | 346 | 1 | 338 | 1 |

**Supplemental Table 7**. Corrections to reference sequence for *S. pneumoniae*. The table shows the 63 corrections made to the *S. pneumoniae* Tigr4 reference (GenBank NC_003028.3) to get it to match the DNA in our sample. The table also infers the state of the original Tigr4 sample from the Sanger chemistry traces used to generate it. Event id: numerical identifier for the event. Coordinate: zero-based start of the change on the reference. Correction event: description of the event. Manual review of Sanger traces: assessment of Sanger chemistry traces from the original Tigr4 sample. Lab validation: outcome of laboratory validation of event using our sample. Fragment pairs: number of fragment pairs favoring correction or reference. Jump pairs: number of jump pairs favoring correction or reference. Fragment and jump pairs: reads were aligned with the Burrows-Wheeler Aligner (BWA) v0.5.9-r16 (Li et al. 2009) with default arguments, using only pairs satisfying the ‘Proper Pair’ flag. Events within 20 bases of the read end were excluded.

*Method not applicable. ‡Method not applicable, similar method substituted: reads were first trimmed to 40 bases. For each pair, we found all perfect placements on either the original or ‘corrected’ reference, in the correct orientation at separation < 10 kb. Pairs aligning to one reference but not the other reference were counted.

**Supplemental Table 8. Computational resource usage by assemblies**

| **#** | **Available cores** | **Elapsed time (hours)** | **Peak memory usage (GB)** |
| --- | --- | --- | --- |
| 1 | 32 | 0.8 | 29.2 |
| 2 | 32 | 6.5 | 83.0 |
| 3 | 24 | 1.2 | 21.2 |
| 4 | 48 | 1.6 | 23.1 |
| 5 | 48 | 0.7 | 31.0 |
| 6 | 48 | 0.6 | 25.3 |
| 7 | 48 | 0.4 | 10.0 |
| 8 | 48 | 1.0 | 24.3 |
| 9 | 32 | 0.7 | 20.4 |
| 10 | 48 | 0.6 | 19.6 |
| 11 | 48 | 0.9 | 30.0 |
| 12 | 48 | 0.8 | 24.7 |
| 13 | 48 | 1.5 | 45.4 |
| 14 | 48 | 1.8 | 40.6 |
| 15 | 24 | 2.4 | 46.0 |
| 16 | 24 | 0.6 | 06.9 |

**Supplemental Table 8**. Computational resource usage by assemblies. Available cores: number of cores on the machine that the assembly was run on. Elapsed time: total time in hours for assembly. Peak memory usage: maximum memory usage in GB. Each assembly was run on a single shared-memory computer, with essentially no other load.

**Supplemental Table 9. Assembly results without long reads**

|  | | **Without long reads** | | | | **With long reads** | | | |
| --- | --- | --- | --- | --- | --- | --- | --- | --- | --- |
| **Sample** | | **Count** | | **N50 (Mb)** | | **Count** | | **N50 (Mb)** | |
| **#** | **Name** | **Contigs** | **Scaffolds** | **Contig** | **Scaffold** | **Contigs** | **Scaffolds** | **Contig** | **Scaffold** |
| 1 | *E. coli* | 31 | 02 | 0.3 | 4.6 | 01 | 01 | 4.6 | 4.6 |
| 2 | *R. sphaeroides* | 44 | 30 | 0.4 | 3.2 | 11 | 11 | 3.2 | 3.2 |
| 3 | *S. pneumoniae* | 33 | 04 | 0.1 | 1.6 | 01 | 01 | 2.2 | 2.2 |
| 4 | *B. eggerthii* | 44 | 27 | 0.4 | 0.6 | 28 | 27 | 0.6 | 0.6 |
| 5 | *B. fragilis* | 22 | 09 | 0.4 | 3.0 | 12 | 12 | 1.3 | 1.3 |
| 6 | *B. thetaiotaomicron* | 25 | 09 | 0.3 | 0.7 | 16 | 15 | 0.5 | 0.7 |
| 7 | *B. bifidum* | 05 | 01 | 0.9 | 2.2 | 01 | 01 | 2.2 | 2.2 |
| 8 | *Coprobacillus* sp. | 37 | 11 | 0.3 | 0.7 | 09 | 08 | 2.8 | 2.8 |
| 9 | *E. casseliflavus* | 01 | 01 | 3.4 | 3.4 | 01 | 01 | 3.4 | 3.4 |
| 10 | *Eubacterium* sp. | 42 | 03 | 0.1 | 1.8 | 06 | 04 | 1.0 | 2.6 |
| 11 | *F. nucleatum* OT 420 | 32 | 08 | 00.07 | 0.7 | 04 | 04 | 2.3 | 2.3 |
| 12 | *F. nucleatum* 7_1 | 55 | 06 | 00.09 | 2.0 | 04 | 04 | 2.2 | 2.2 |
| 13 | *K. oxytoca* | 35 | 03 | 0.3 | 4.1 | 04 | 04 | 5.8 | 5.8 |
| 14 | *N. gonorrhoeae* FA19 | 56 | 14 | 00.08 | 1.3 | 11 | 10 | 0.5 | 1.3 |
| 15 | *N. gonorrhoeae* MS11 | 63 | 10 | 00.08 | 0.5 | 07 | 06 | 1.3 | 1.3 |
| 16 | *S. wiggsiae* | 07 | 04 | 0.6 | 1.2 | 01 | 01 | 1.6 | 1.6 |

**Supplemental Table 9**. Assembly results without long reads. Left: we assembled the 16 assemblies of Table 3 again using the same ALLPATHS-LG revision and default arguments, however this time did not include long reads as input. Right: results using all data (for comparison, copied from Table 3). Count: number of contigs and scaffolds in each assembly. Genome size (Mb): from Table 2. N50: contig (or scaffold) size such that half the assembly bases were included in contigs (or scaffolds) of that size or larger. Gaps were not included in scaffold sizes.

**Supplemental Figure 1. Coverage as a function of GC content.**

**(a)**


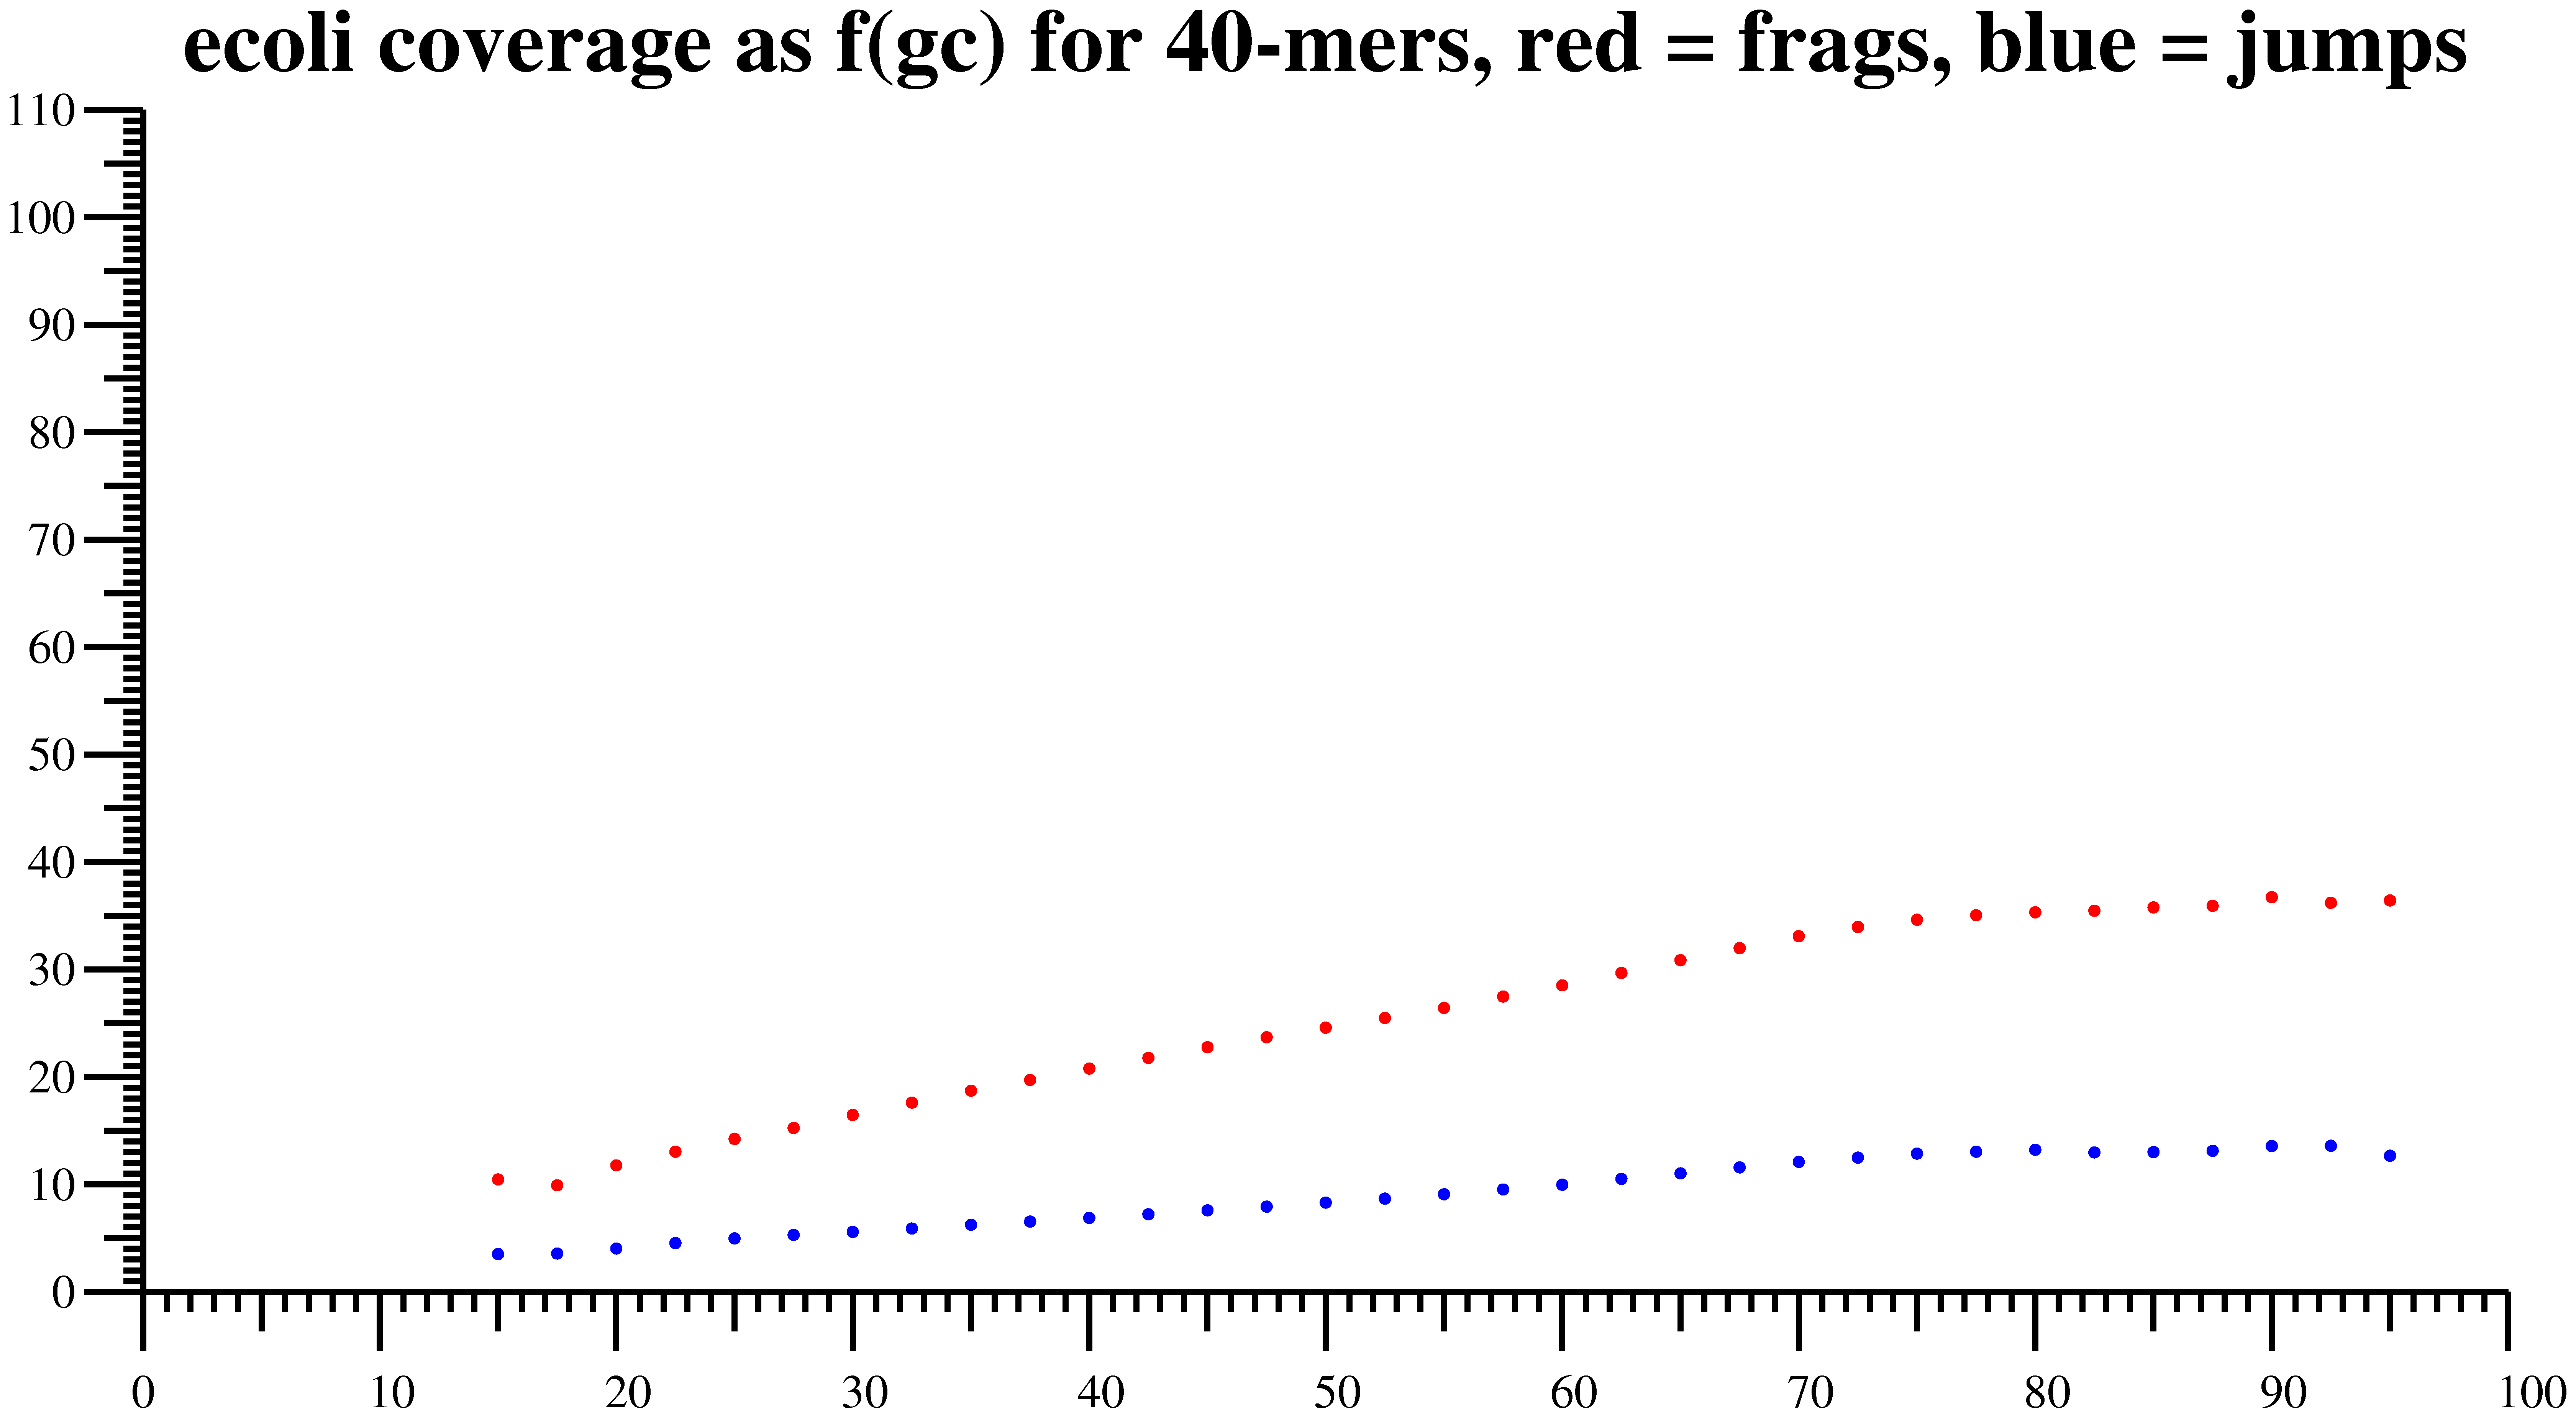


**(b)**


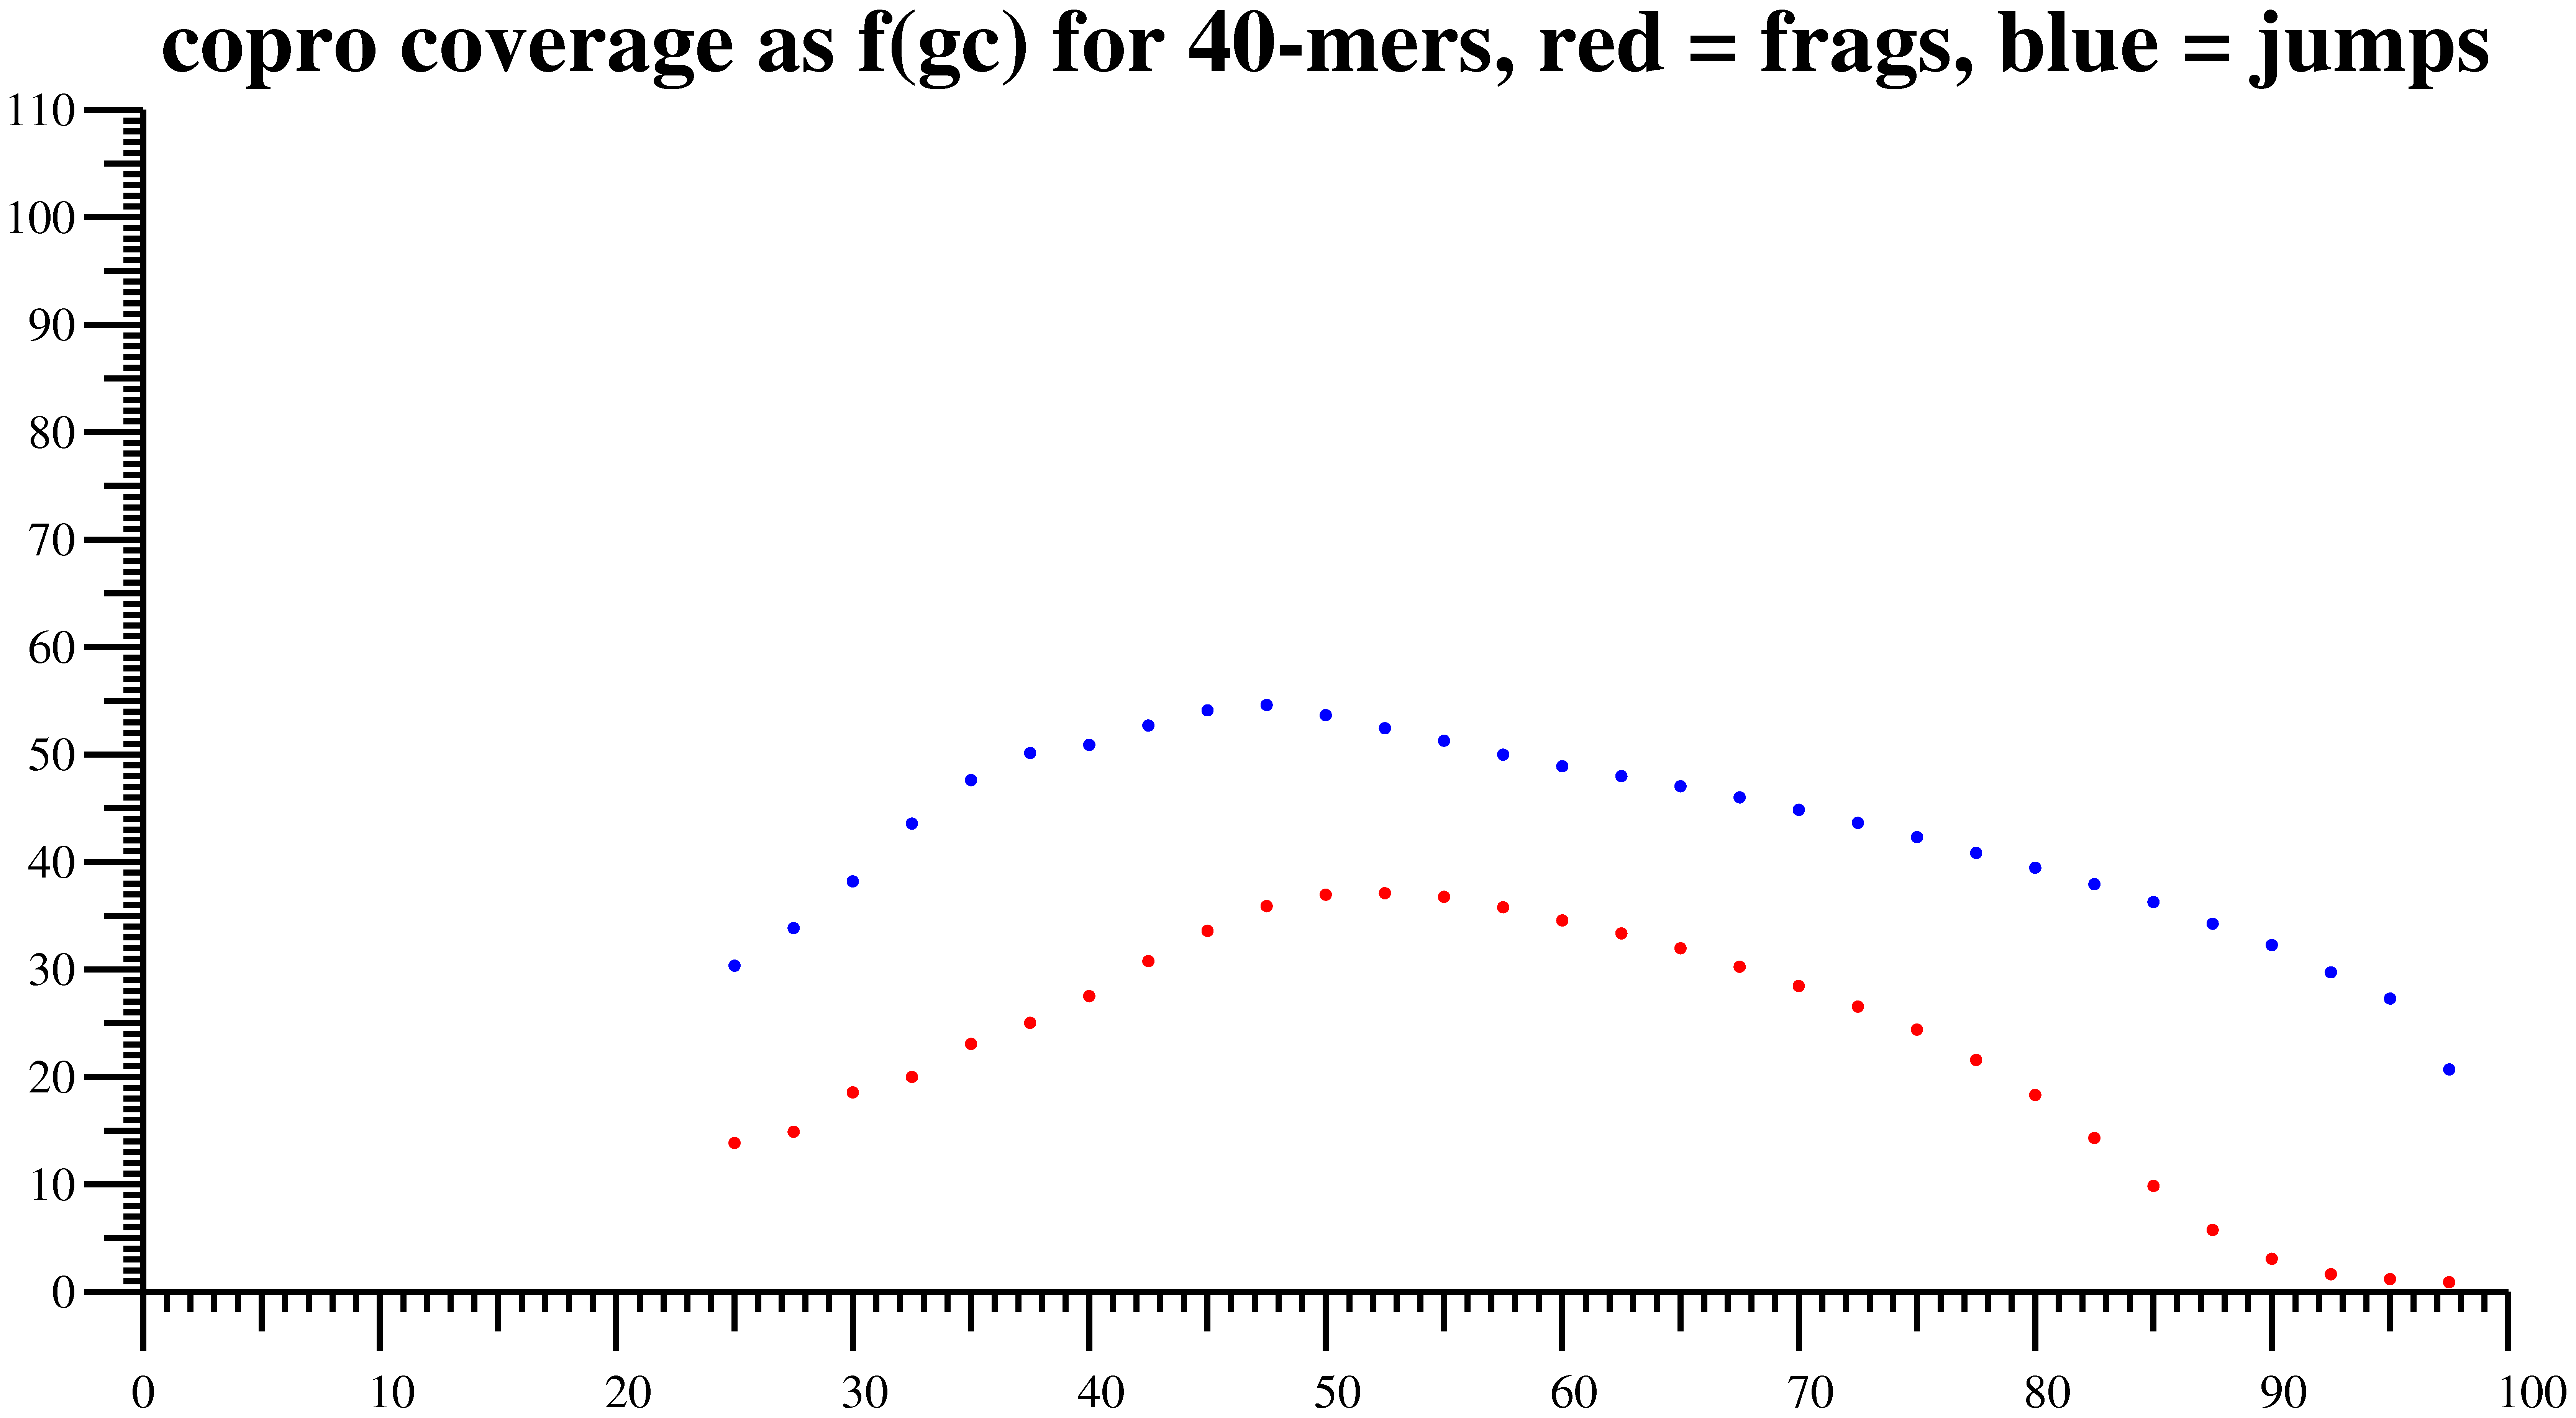


**(c)**


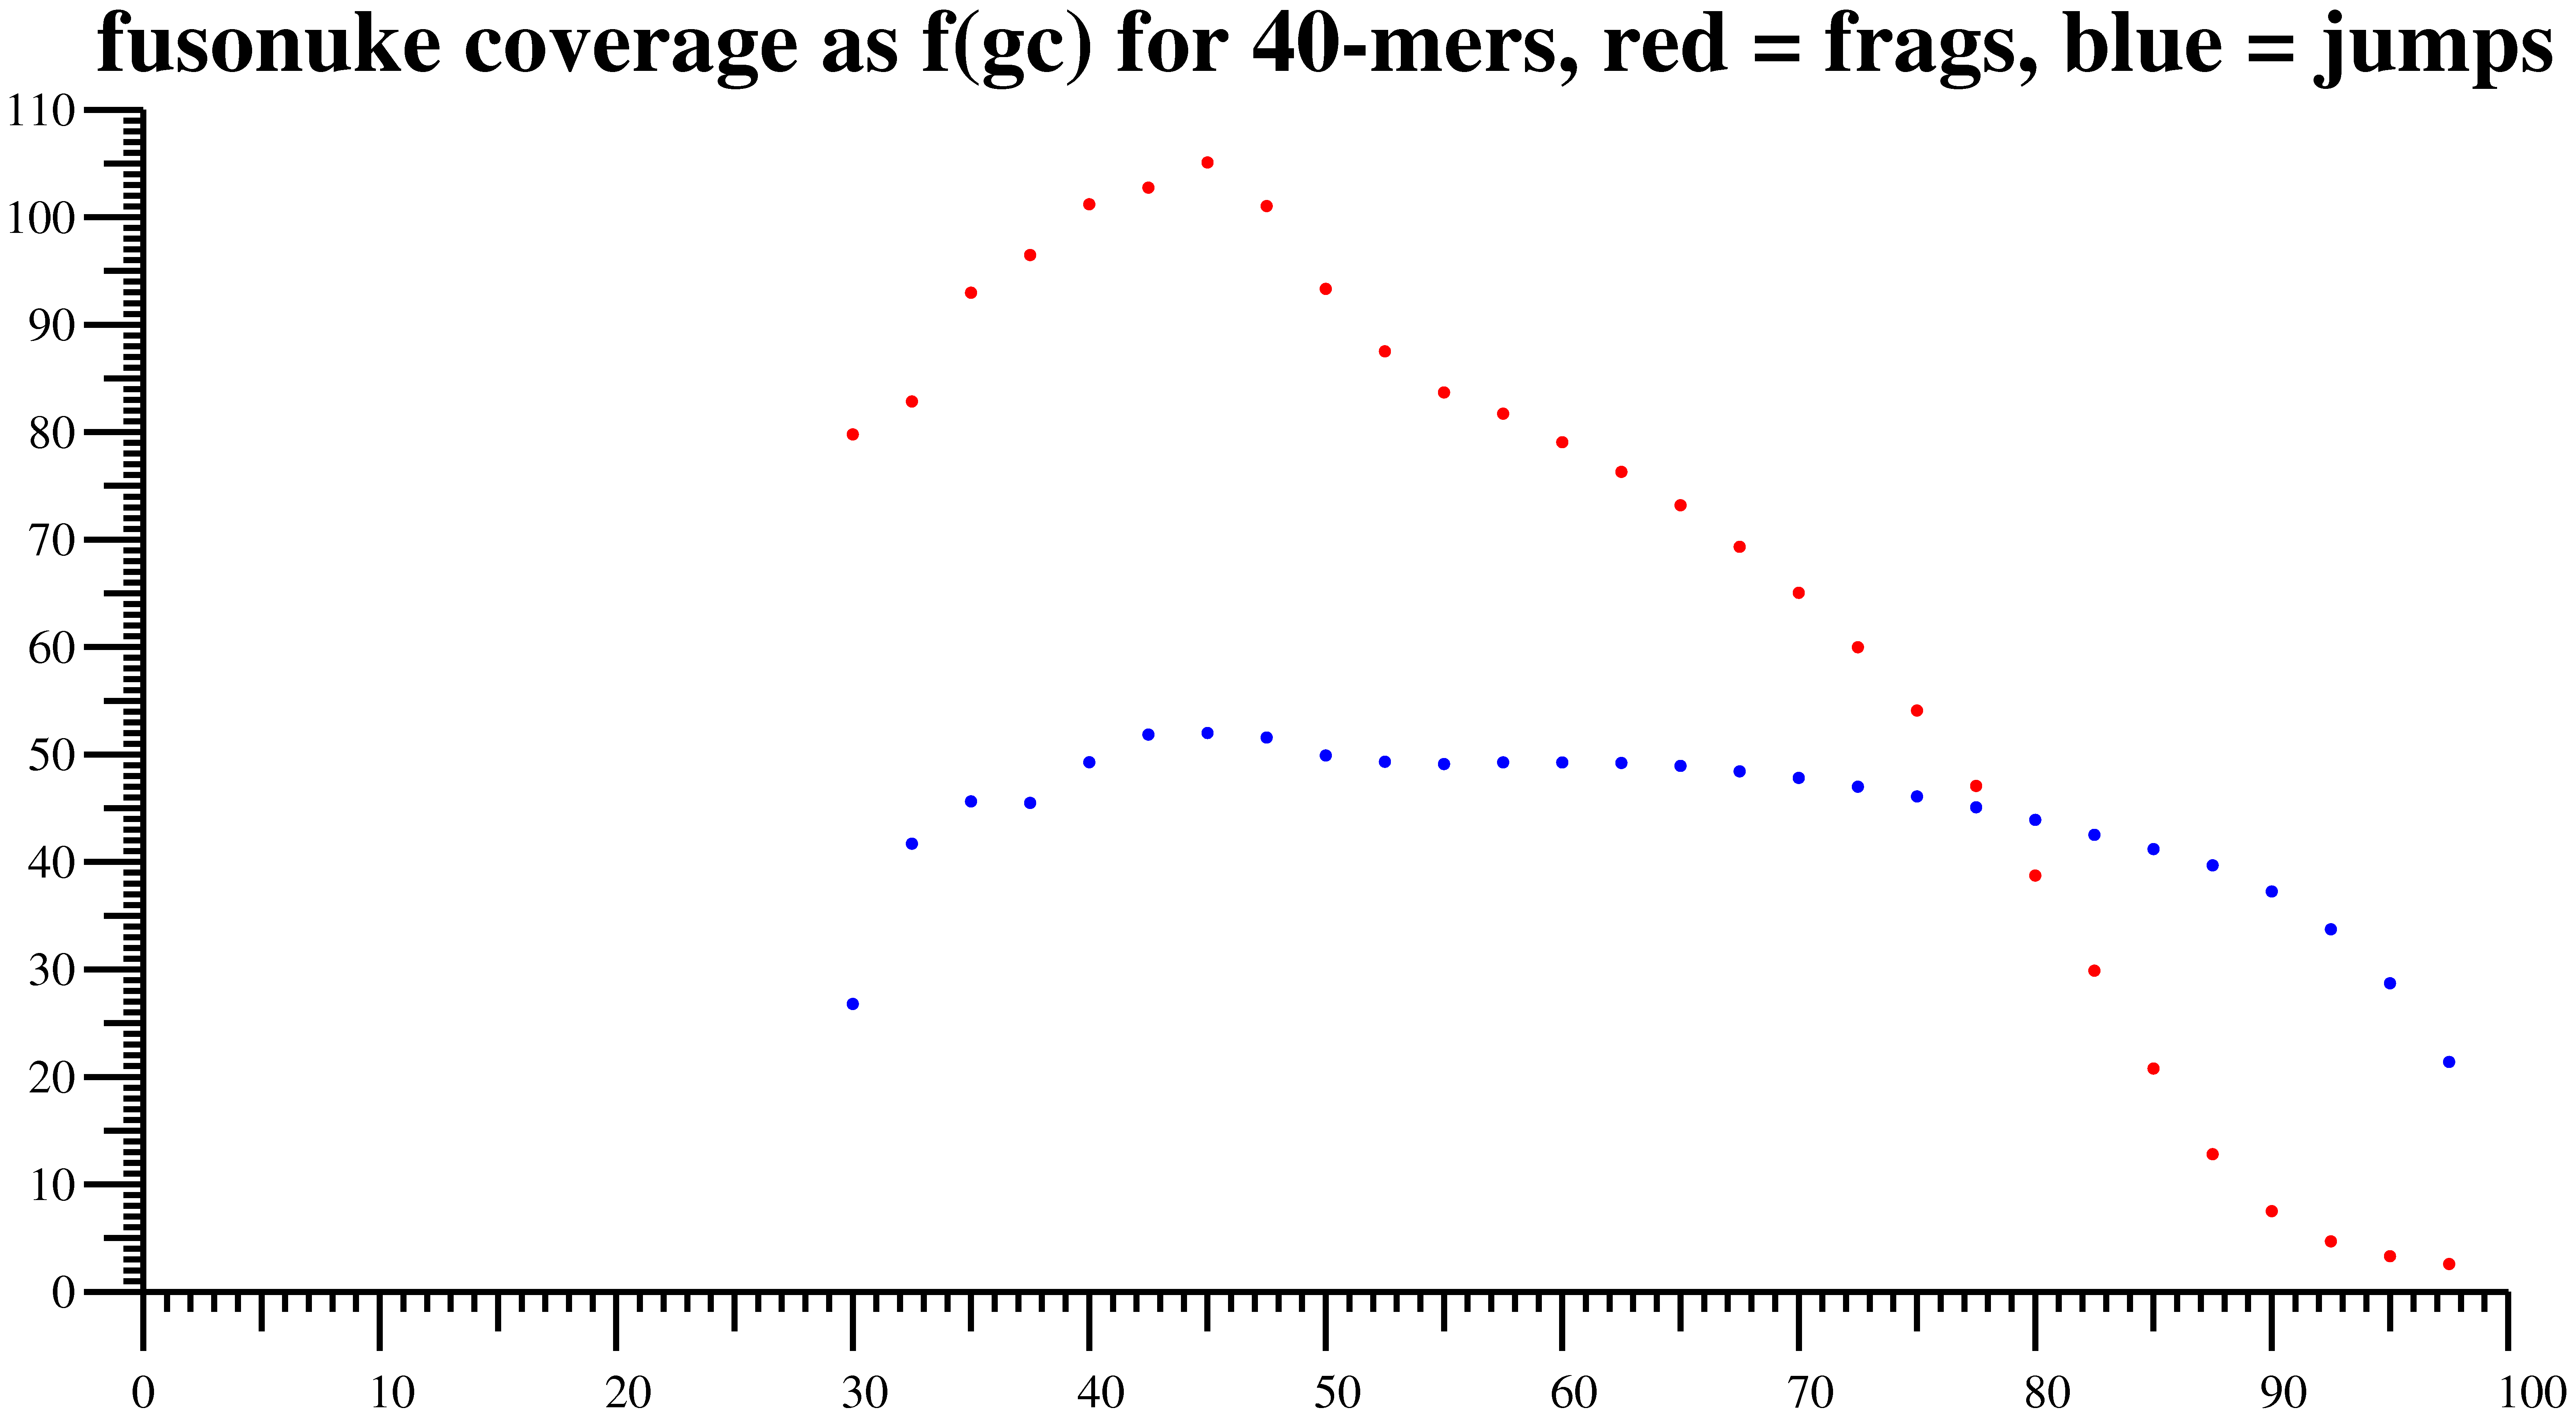


**Supplemental Figure 1**. Coverage as a function of GC content. For three samples we show coverage by fragment reads (red) and jump reads (blue), computed in each case as a quotient: number of 40-mers in the reads of a given GC content, divided by number of 40-mers in the assembly, of the same GC content. We excluded 40-mers in the reads that did not occur in the assembly. (a): sample 1 (*E. coli*); (b): sample 8 (*Coprobacillus* sp.); (c): sample 11 (*F. nucleatum* OT 420).

**Supplemental Figure 2. Manual review of Sanger traces shows systematic errors in phred basecalls (example)**

**(a)**


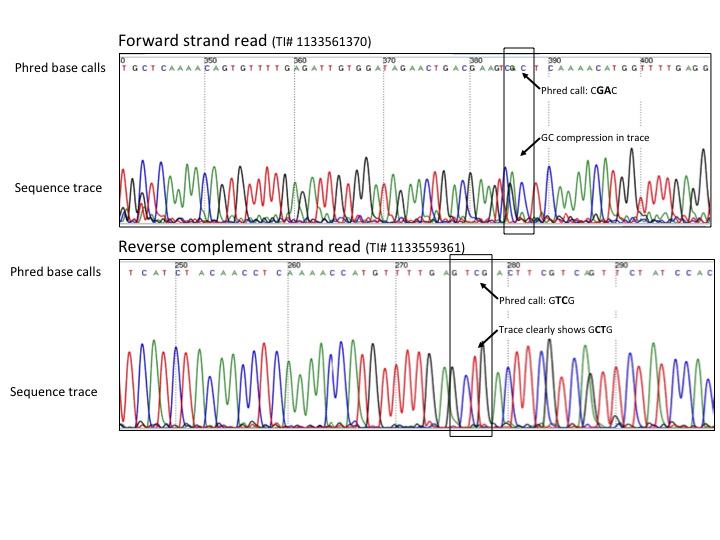


**(b)**


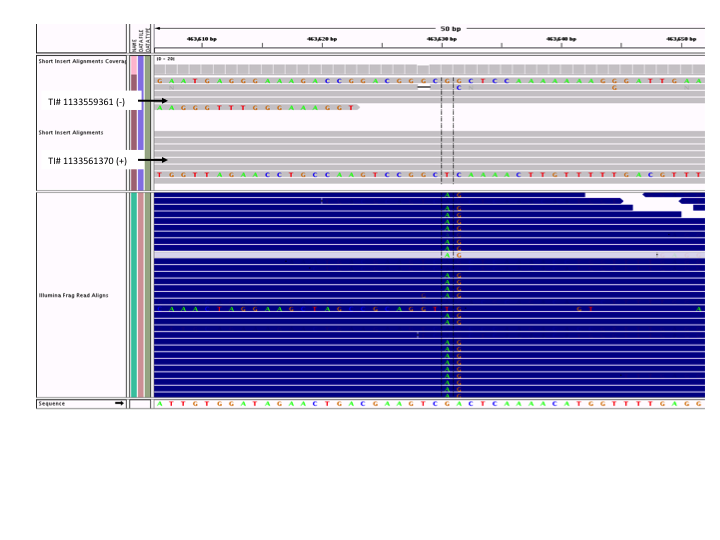


**Supplemental Figure 2**. Manual review of Sanger traces shows systematic errors in phred basecalls (example).

The figure presents evidence for events #10-11 from Supplemental Table 7, concerning bases 463,629 - 463,630 in the *Streptococcus pneumoniae* Tigr4 finished reference genome.

**(a)** Forward strand read (top) and reverse strand read (bottom) cover the locus. These traces were used in the original finishing project, and were downloaded from <http://www.ncbi.nlm.nih.gov/Traces/trace.cgi>. Boxes span the site in question. The forward (top) trace contains a clear GC compression leading to an incorrect phred base call of GA rather than the correct AG. The reverse (bottom) trace shows incorrect phred base calling of TC (rc=GA) even though it is clear from chromatogram that the base call should be CT (reverse complement AG).

**(b)** Illumina read data spanning this site match the manual AG call at this site, to support the change in the reference. The same region as in (a),showing both original Sanger and our new Illumina read data aligned, viewed in IGV (Integrated Genomics Viewer, Robinson et al. 2011). Sanger read alignments are shown in the top track (gray). The ten well aligned Sanger reads contain the systematic error as in (a) that support the consensus call of GA at 463,629 - 463,630, though manual inspection shows they provide evidence for the correction from GA to AG. Illumina reads, shown in the bottom track (blue), strongly support the change in the reference from GA to AG. The Sanger reads shown in (a) are marked, one from each strand.

**Supplemental Figure 3. Graph assemblies for samples #4-16**

**#4, *Bacteroides eggerthii* 1_2_48FAA**

**
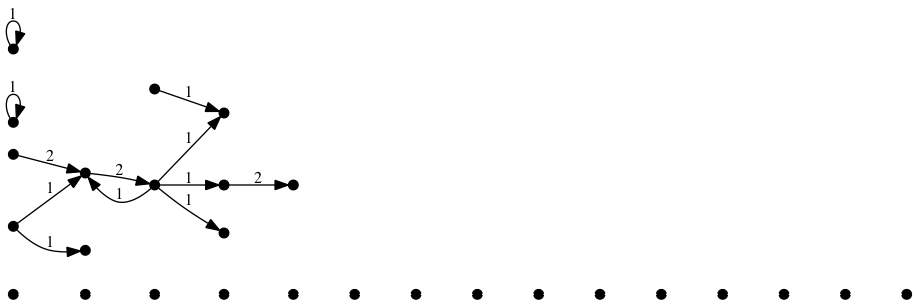
**

**#5, *Bacteroides fragilis* CL05T00C42**

**
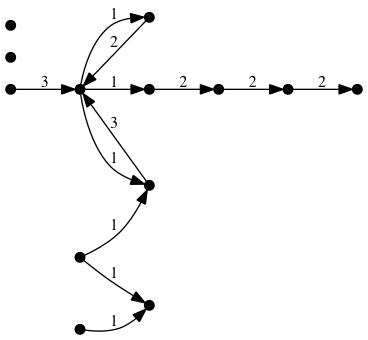
**

**#6, *Bacteroides thetaiotaomicron* CL09T03C10**

**
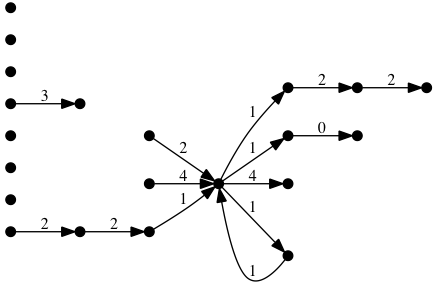
**

**#7, *Bacteroides bifidum* NCIMB 41171**

**
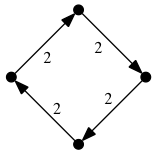
**

**#8, *Coprobacillus* sp. D6**

**
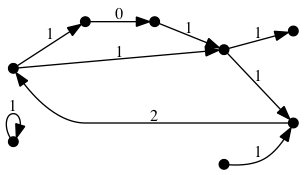
**

**#9, *Enterococcus casseliflavus* EC20**

**
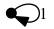
**

**#10, *Eubacterium* sp. 3_1_31**

**
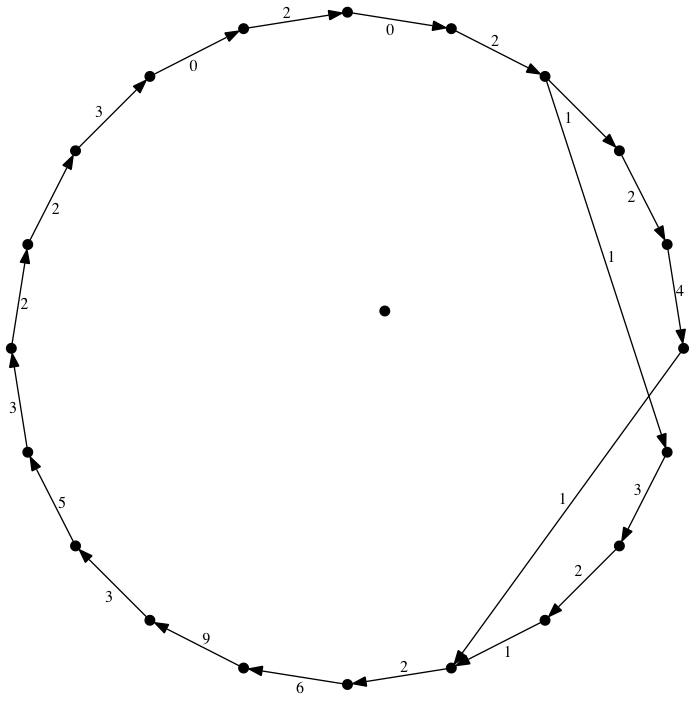
**

**#11, *Fusobacterium nucleatum* OT 420**

**
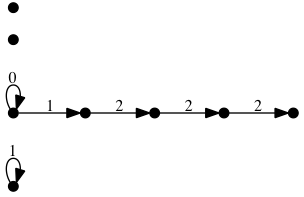
**

**#12, *Fusobacterium nucleatum* 7_1**

**
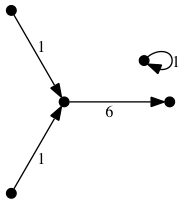
**

**#13, *Klebsiella oxytoca* 10-5248**

**
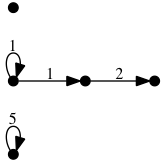
**

**#14, *Neisseria gonorrhoeae* FA19**

**
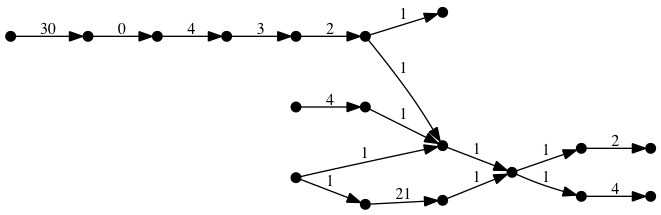
**

**#15, *Neisseria gonorrhoeae* MS11**

**
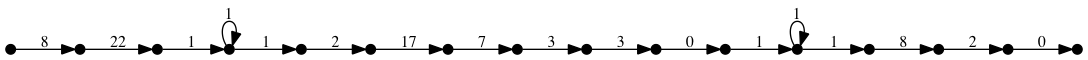
**

**#16, *Scardovia wiggsiae* F0424**


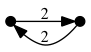


**Supplemental Figure 3**. Graph assemblies for samples #4-16. Vertices in the graph represent completely determined sequences, whereas a given edge represents *n* possibilities for the sequence between two vertices, and is labeled accordingly. For *n* > 1, these are local ambiguities. The case *n* = 0 represents a gap. Images were generated using graphviz, <http://www.graphviz.org>.

**Supplemental Methods. Data generation**

Data were generated as in (Grad et al. 2012), and repeated below for convenience, with exceptions noted.

Illumina. Illumina fragment libraries were generated as previously described (Bentley et al. 2008) with the following modifications. For each sample, 100 ng of genomic DNA was sheared to 150-300 bp in size using a Covaris LE220 instrument (Covaris, MA) with the following parameters: temperature: 7–9 °C; duty cycle: 20%; intensity: 5; cycles per burst: 200; time: 90 s; shearing tubes: Crimp Cap microTUBES with AFA fibers Covaris, MA). DNA fragments were end repaired, 3′ adenylated, ligated with indexed Illumina sequencing adapter, and PCR enriched, as previously described (Fisher et al. 2011). The resulting Illumina fragment sequencing libraries were size selected to contain inserts of 180 bp ± 3% in length using a Pippen Prep system (Sage Science, MA) following the manufacturer’s recommendations. For *R. sphaeroides* data type A, preexisting data from a PCR-free library was used. It was generated as previously described (Kozarewa et al. 2009).

Illumina 3 kb jumping sequencing libraries were prepared according to the manufacturer’s protocol (2 to 5 kb insert Illumina Mate pair library prep kit V2; Illumina, CA) with the following modifications. For each sample, 5 μg of genomic DNA was sheared to 3–5 kb in size using a Covaris LE220 instrument (Covaris, MA) with the following parameters: temperature: 19–21 °C; duty cycle: 20%; intensity: 2; cycles per burst: 1,000; time: 300 sec; shearing tubes: MiniTUBE RED (Covaris, MA). Fragmented DNA was size selected using 0.45× volumes of Agencourt AMPure XP beads (Beckman Coulter Genomics, MA) according to the manufacturer’s recommendations. DNA fragments were end repaired using NEBNext Reagents for DNA Sample Preparation for Illumina (New England Biolabs, MA), and biotinylated dNTPs (Perkin Elmer, MA) following the manufacturer’s recommendations. Blunt ended, biotinylated DNA fragments were circularized at 16 °C using T3 DNA Ligase (Enzymatics, MA). Following ligation, remaining linear fragments were removed by exonuclease treatment using PlasmidSafe ATP dependent DNase (Epicentre Biotechnologies, WI). Circularized fragments were sheared to ∼450 bp in length using a Covaris LE220 instrument (Covaris, MA) with the following parameters: temperature: 7 °C; duty cycle: 15%; intensity: 10; cycles per burst: 200; time: 90 s; shearing tubes: Crimp Cap microTUBES with AFA fibers (Covaris, MA). Sheared fragments were size selected using 0.65× volumes of Agencourt AMPure XP beads (Beckman Coulter Genomics, MA), and immobilized using Dynal M280 Streptavidin coupled Dynabeads (Invitrogen, CA) according to the manufacturer’s recommendations. Illumina sequencing libraries were prepared from immobilized fragments using the NEBNext Reagents for DNA Sample Preparation for Illumina according to the manufacturer’s suggested protocol (New England Biolabs, MA) using indexed Illumina sequencing adapters. Libraries were enriched according to the Illumina protocol and purified using 0.65× volumes of Agencourt AMPure XP beads (Beckman Coulter Genomics, MA). All liquid handling steps were performed using a Bravo Automated Liquid Handler (Agilent Technologies, CA).

Illumina sequencing libraries were quantified using quantitative PCR (KAPA Biosystems, MA) following the manufacturer’s recommendations. Libraries were normalized to 2 nM and denatured using 0.1 N NaOH. Sequencing Flowcell cluster amplification was performed according to the manufacturer’s recommendations using the V3 TruSeq PE Cluster Kit and V3 TruSeq Flowcells (Illumina, CA). Flowcells were sequenced with 101 base paired end reads on a Illumina HiSeq2000 instrument, using V3 TruSeq Sequencing by synthesis kits and analyzed with the Illumina RTA v1.12 pipeline (Illumina, CA).

Pacific Biosciences. Pacific Biosciences sequencing libraries were generated following the manufacturer’s recommendations. For 3 kb insert libraries the DNA Template Prep Kit V1.2.1 (Pacific Biosciences, CA) was used with the following modifications. 10 μg of genomic DNA was sheared to ∼3 kb in size using a Covaris LE220 instrument (Covaris, MA) with the following parameters: temperature: 19–21 °C; duty cycle: 20%; intensity: 0.1; cycles per burst: 1,000; time: 10 min; shearing tubes: MiniTUBE BLUE (Covaris, MA). DNA fragments were purified, end repaired, and ligated with SMRTbell sequencing adapters following manufacturer’s recommendations (Pacific Biosciences, CA). Resulting sequencing libraries were purified three times using 0.6× volumes of Agencourt AMPure XP beads (Beckman Coulter Genomics, MA) following the manufacturer’s recommendations. The 6 kb and 10 kb insert libraries generated for *Coprobacillus* sp. D6 and *Bacteroides eggerthii* 1_2_48FAA were generated following manufacturer’s recommendations (Pacific Biosciences, CA) using the ‘5 kb Template Preparation and Sequencing’ protocol for 6 kb insert libraries and the ‘10 kb Template Preparation and Sequencing’ protocol for 10 kb inserts with the following modifications. Genomic DNA was sheared using the Covaris g-TUBE (Covaris, MA) using the following conditions. For 6 kb inserts 4 μg of DNA was spun in a Covaris g-TUBE at 11,000 RPM for 30 seconds using an Eppendorf 5424 centrifuge (Eppendorf, NY). For 10 kb inserts 8 μg of DNA was spun in a Covaris g-TUBE (Covaris, MA) at 6,000 RPM for 60 seconds using an Eppendorf 5424 centrifuge (Eppendorf, NY).  DNA fragments were then purified, end-repaired and ligated with SMRTbell sequencing adapters following manufacturer’s recommendations (Pacific Biosciences, CA). Resulting sequencing libraries were purified three times using 0.45 x volumes of Agencourt AMPure XP beads (Beckman Coulter Genomics, MA) following the manufacturer’s recommendations.

SMRTbell sequencing libraries were combined with sequencing primer and polymerase following manufacturer’s recommendations (Pacific Biosciences, CA). The resulting complex was subjected to Pacific Biosciences sequencing [PMID: 19023044] on the PacBio RS instrument followed by primary data analysis following manufacturer’s recommendations (Pacific Biosciences, CA). The 3kb insert libraries were sequenced using version 1 chemistry and version 1.1.1 analysis software. The 6kb and 10k libraries were sequenced using version 2 chemistry and version 1.3 analysis software (Pacific Biosciences, CA).

**Supplemental References**

Fisher S, Barry A, Abreu J, Minie B, Nolan J, Delorey TM, Young G, Fennell TJ, Allen A, Ambrogio L, et al. 2011. A scalable, fully automated process for construction of sequence-ready human exome targeted capture libraries. *Genome Biol* **12:** R1.

Kozarewa I, Ning Z, Quail MA, Sanders MJ, Berriman M, Turner DJ. 2009. Amplification-free Illumina sequence-library preparation facilitates improved mapping and assembly of (G+C)-biased genomes. *Nat Methods* **6:** 291-295.

Li H, Durbin R. 2009. Fast and accurate alignment with Burrows-Wheeler transform. *Bioinformatics* **25:** 1754-1760.

Robinson JT, Thorvaldsdóttir H, Winckler W, Guttman M, Lander ES, Getz G, Mesirov JP. 2011. Integrative genomics viewer. *Nat Biotechnol* **29:** 24-26.

**Supplemental Methods. Assembly algorithms**

Here we provide more details about the assembly algorithm, in terms of the main text outline.

General comments on I and II, unipath construction. The algorithm builds an approximation to the ‘true’ unipath graph, that could be created from the exact genome sequence, if we knew it. Defects in such an approximation fall into two main categories: (i) gaps in true coverage, *i.e.* loci not covered by unipaths matching the genome perfectly and (ii) junk, *i.e.* ‘extraneous’ unipaths, typically small and typically arising from systematic sequencing errors. While both (i) and (ii) are problems for downstream parts of the assembly algorithm, our primary concern is with (i): it is critical that there are no gaps.

Details for step I.2, unipath patching using jumps. It can happen that jumping pairs (data type C) provide coverage at loci where the fragment reads (data type A) do not. Because the jumping reads have not been merged into super-reads, to ‘extract coverage’ from them, we have to use a smaller minimum overlap. We used 40, denoted here by M. The jumping reads are not error corrected as part of this process. Instead, we start by finding unipaths u that are terminal (*i.e.* not overlapping another on their right end by K-1 bases). We take the M-mer x1 starting at position |u| - K on u, where the ‘absolute value’ signs denote length in bases. We iteratively build a sequence x1,...,xn of successive M-mers, as follows. Let f = 5. We find all (M+f)-mers in the jumping reads that start with xi, then sort these by frequency, weighting by quality scores. The most frequent (M+f)-mer must appear at least 5 times more than the next most frequent, and this next most frequent (M+f)-mer must appear at most 2 times. If this is not the case, the sequence is terminated. Otherwise the most frequent (M+f)-mer is used to define the successor xi+1 of xi. Using this procedure we thus build x1,...,xn up to either a *bona fide* branch, or a point where there is not enough data (or the data is noisy). At branch points we attempt to elide the branch by walking forward on the given set of reads. We also stop at n = 1000 if the sequence has not already terminated. Then we merge x1,...,xn to form a single sequence, which is combined with the unipath graph, thereby filling some gaps in it.

We note that we only added this step after observing that initial versions of some of the 16 assemblies were highly fragmented, and that these assemblies could be ‘rescued’ using the jumps. Notably for sample #8 (*Coprobacillus*), whose overall GC content is ~30%, we observed islands of length several hundred bases, having GC content ~20%, that had virtually no fragment read coverage, but did have coverage by the jumps.

Details for step I.3, unipath patching using long reads.

1. Matches. We find all the L-mer matches between the long reads and the unipaths, where L = 11. Longer values of L would reduce sensitivity, whereas shorter values would reduce the specificity of the matches and thus possibly confuse the subsequent algorithms. The chosen value is about right for the current Pacific Biosciences data (which has a ~15% error rate) but may not be optimal. We note that if a read has a sequence of K-1 bases within it that does not subsume a perfect L-mer match to the genome, then the algorithm described below may fail to align it correctly to the unipaths.
2. Clusters. Matches for each read are now grouped into clusters (see Supplemental Figure 4, below). A given cluster will consist of some of the matches between a given read and a given unipath. In general it is not desirable for it to consist of all such matches, because a read may come from a part of the genome that has the same unipath twice (nearby), and it would be best to get the corresponding matches into separate clusters. To that end we employ the following heuristics. Consider the matches between a single read and a single unipath. We define the *distance* between a pair of such matches to be the distance between their start positions on the read, plus five times the distance between their start positions on the unipath. Distances greater than 1000 are ignored. We then sort these distance measurements, and use them to form chains of matches, by progressively joining the closest matches. If we think of each match as defining a point, then the process progressively joins these points together by line segments, but never introduces branches. At the end of the process the matches are thus divided into ‘lines’, each consisting of a sequence of connected line segments (or just a point, in case a match is not connected to any other). These lines define the clusters.

**Supplemental Figure 4. Clusters of L-mer matches**


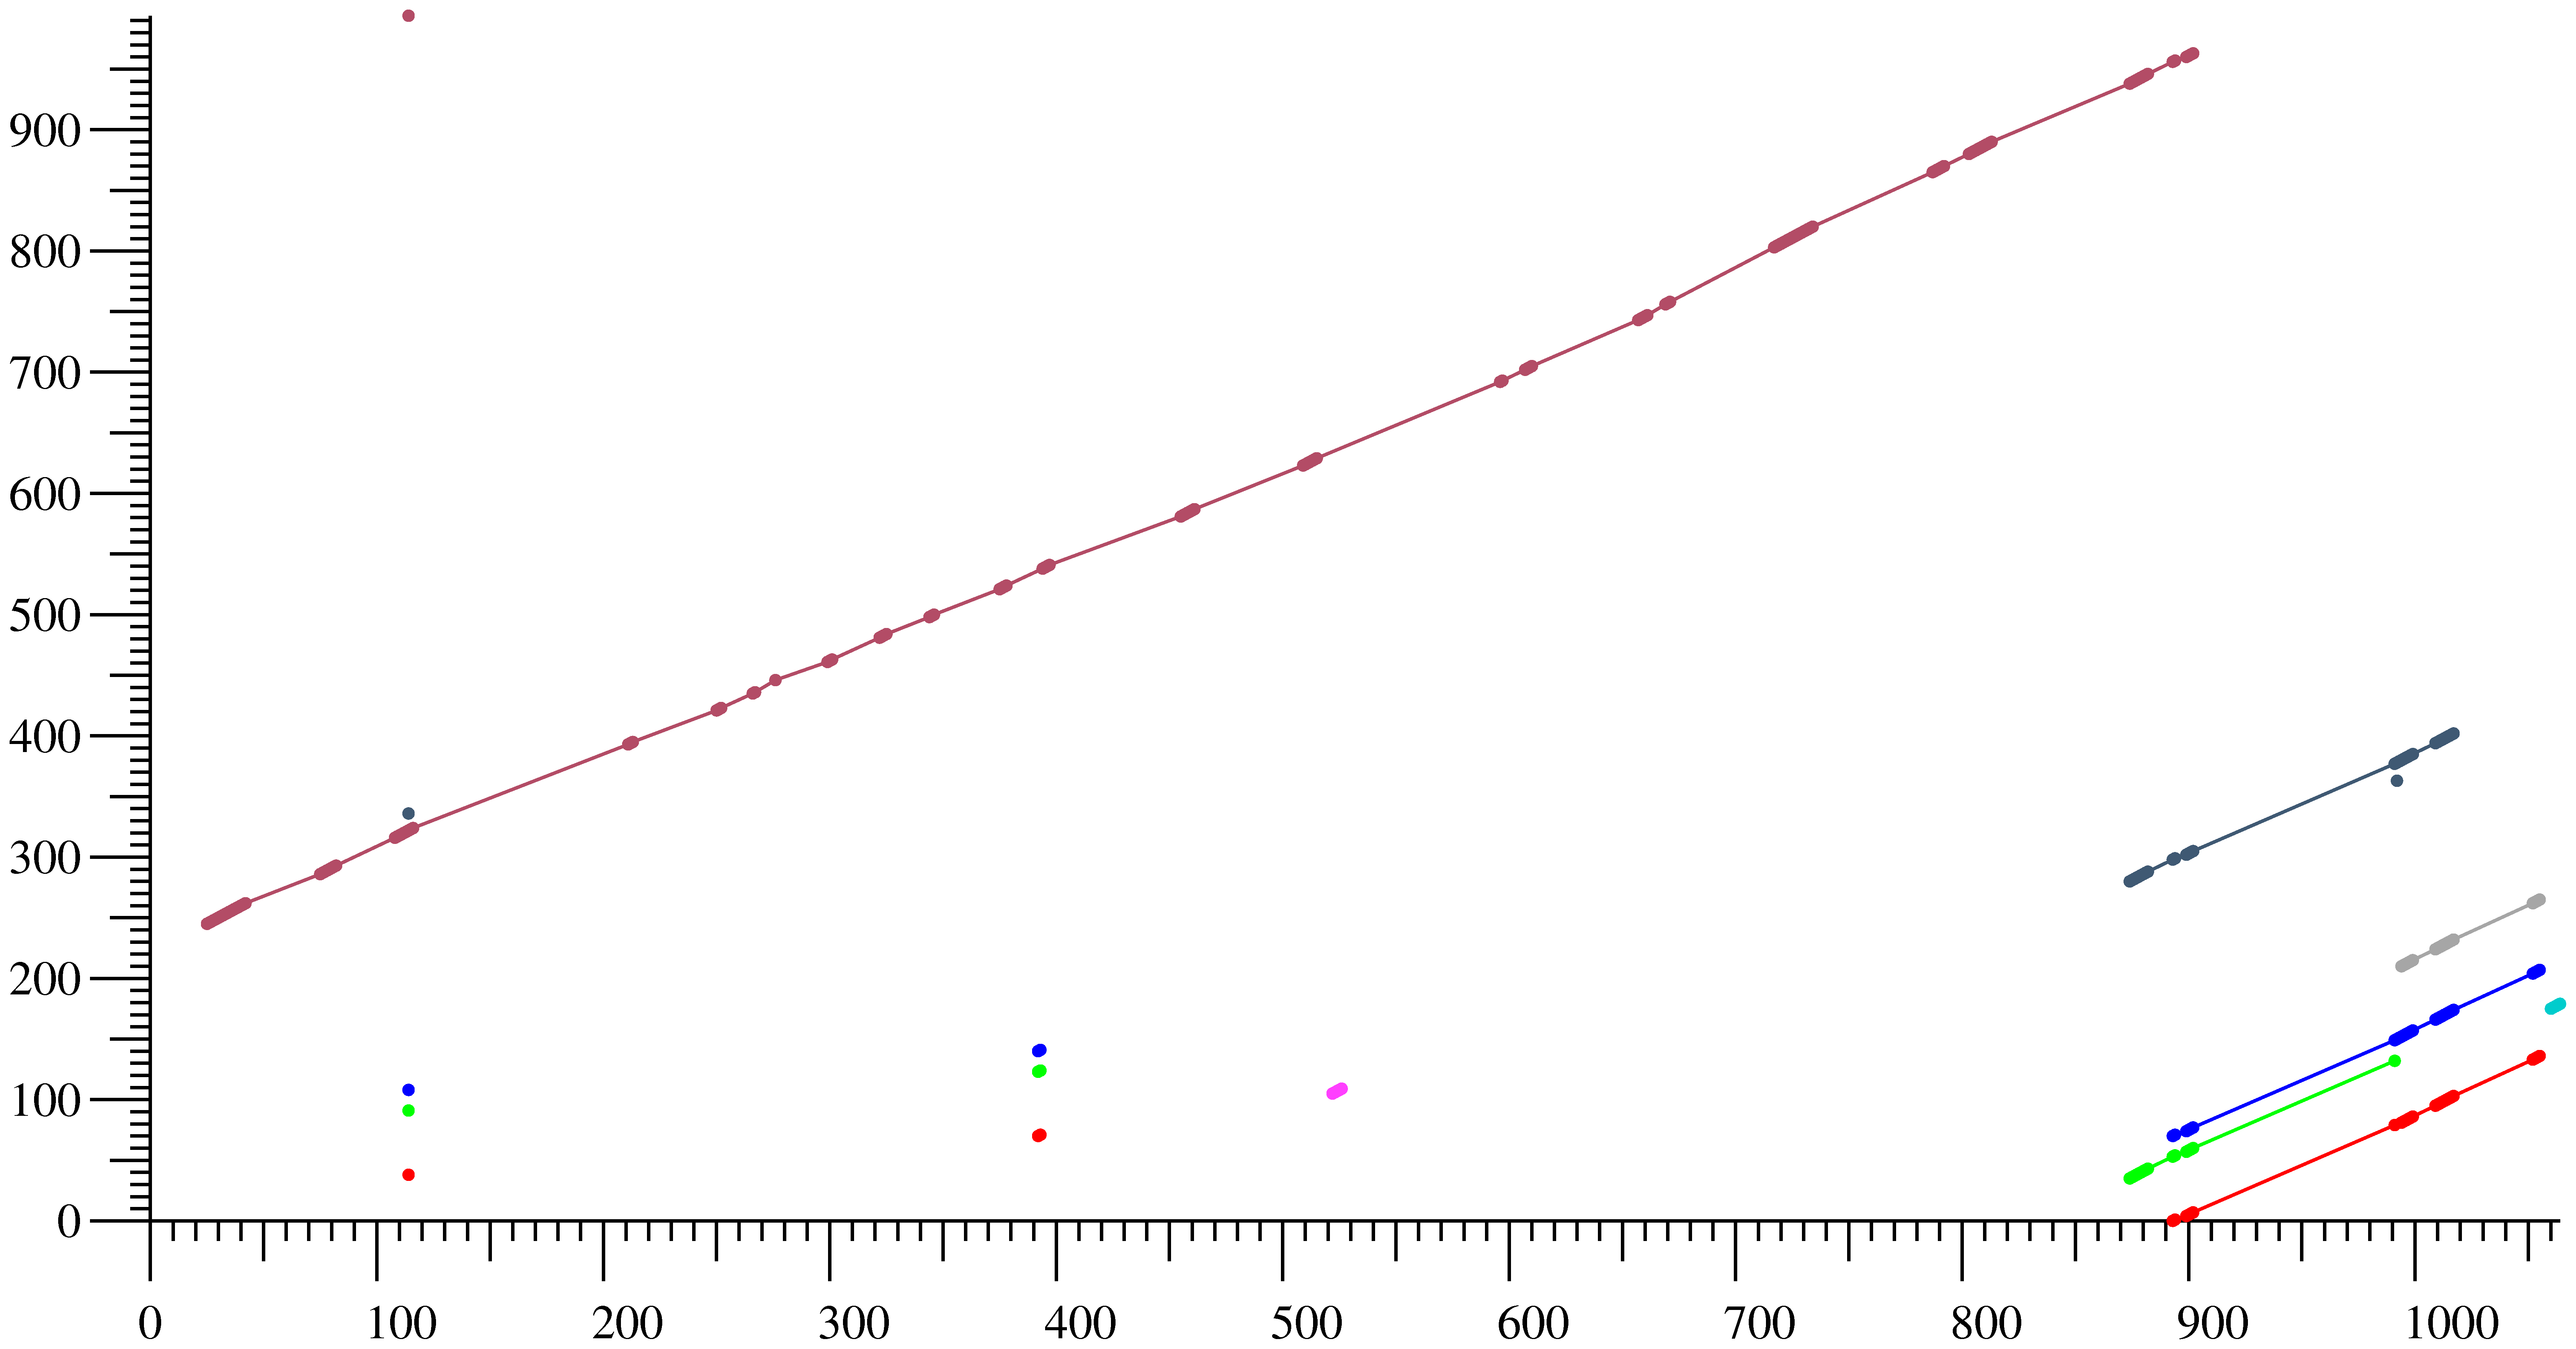


**Supplemental Figure 4**. Clusters of L-mer matches. Plot shows L-mer matches between a single long read from sample 16 (*Scardovia wiggsiae*) and unipaths from it. Each color represents a unipath, and each dot represents a match. The x-axis represents read positions. The y-axis represents positions on a unipath, however for a given unipath, positions were shifted to compactify the graph. A few outliers and small clusters were manually removed to improve legibility. Line segments are as in the construction of clusters, and the components (such as the large brown entity) are the ‘lines’, which define clusters.

1. Filtering. We next filter the clusters for a given read to remove those that appear unlikely to represent true genomic correspondence between the read and the unipaths. To do this we associate to each cluster the interval of bases on the read corresponding to it. Then we look for pairs of clusters for which the first cluster dominates the second, as defined by the following criteria. The interval of bases for the first cluster must subsume the interval for the second cluster. Then we require that the number of L-mer matches for the first cluster that falls within the base interval for the second cluster is at least twice as large as the number of L-mer matches for the second cluster. In that case we declare that the first cluster dominates the second, and then delete the second cluster.
2. Potential gap identification. We next use the long reads to identify possible gaps in the unipath graph, that are to be ‘patched’. For this, we first find clusters that ‘go up to the end of a unipath’. More specifically, we require that the cluster go up to within 100 bases of the unipath end, and that it consists of at least 20 matches, and that the matches span a stretch of at least 200 bases on the unipath. For a given read, we then consider pairs consisting of a cluster that goes up to the right end of one unipath, and another cluster that goes up to the left end of another unipath, with the second cluster appearing to the right of the first cluster on the read. Such data define a potential patch. Cases in which both unipaths appear to have copy number exceeding one in the genome are excluded (see below). We do this because the algorithm described below can only produce one consensus sequence, which could be incorrect if similar versions appeared more than once in the genome. To test whether a unipath u appears to have copy number exceeding one, we look for another unipath v, |v| ≥ |u|, where there are at least 3 links from u to v, and such that the read density of u is at least twice that of v. We note that this test will not identify all cases where copy number exceeds one.

We also note that the unipaths are not required to be terminal (in the sense of step I.2), and as a consequence the algorithm both finds rare cases where a gap is hidden, for example in duplicated regions, and creates many superfluous patches (and in so doing occasionally introduces an incorrect ‘patch’). This tradeoff is a central difficulty of the method.

1. Patch setup. If for two unipaths, we find at least 5 potential patches, then we attempt to form their consensus. The first step is to ‘synchronize’ the ends of the potential patches (Supplemental Figure 5, below). To do this we note that the two clusters defining the potential patch provide ‘bounding’ matches for the patch, namely the rightmost match in the left cluster, and the leftmost match in the right cluster. The intervening sequence on the read (between the bounds) starts at a particular position on the left unipath, and ends at a particular position on the right unipath, but these positions will vary from patch to patch. Therefore to synchronize the ends, we extend these ‘readlets’ by appending sequence from the unipaths to both their ends, so that these ‘appended readlets’ now start and end at the same places on the left and right unipaths.
2. Patch consensus. Now we form the consensus of the patch sequences, whose ends have been synchronized as above (Supplemental Figure 5, below). To do this we select one of the sequences (effectively at random), which we call the *candidate*. We then compute the sum of the edit distances of the candidate to the other sequences. Next we progressively edit the candidate, considering all possible substitutions, single base insertions, and single base deletions. We make each such change if it reduces the distance sum to the other sequences, and the process is iterated until no further improvement is possible. This defines the consensus sequence for the patch. We note that it is possible to have more than one ‘consensus’ sequence that score equally, but that the algorithm effectively picks one of these at random. We note also that it is possible that the algorithm, which finds a local minimum for the score, does not find a global minimum.

**Supplemental Figure 5. Patch setup and consensus**

**Supplemental Figure 5**. Patch setup and consensus (steps e and f, above). **(a)** Two unipaths (black) have a ‘gap’ between them. Readlets (red with green termini) match unipaths along L-mers (green). Readlets are extended (blue) by copying unipath sequence, thus yielding composite sequences that all have the same start and stop on the unipaths. **(b)** Consensus is derived for a family of extended readlets (now shown as entirely red). First a ‘candidate’ is selected (essentially at random), and progressively edited by a sequence of single-base deletions, insertions and substitutions, until its total edit distance to the family is at a local minimum. This defines the consensus.

1. Patch consensus improvement. The consensus patches can still have errors. Almost all of these are insertion errors, as expected from the Pacific Biosciences sequencing technology, and the overall error rate is ~1%. Because these errors are ‘orthogonal’ to the typical error mode for Illumina sequencing, it is in principle possible to correct many of them with the aid of the Illumina fragment read pair data (data type A). We note that this is the case even though the fragment pairs have already been used (step I.1), because we have only used those pairs that have a closure, yet we are now working on a difficult locus of the genome for which there may be a gap in Illumina coverage, and hence no possibility of closing pairs across it using the Illumina data alone. We expect that the quality of the Illumina data at such loci may be low.

We proceed as follows. First we find the error-corrected fragment pair reads whose first 20 bases match the patch (or its reverse complement) perfectly. We extend these matches to alignments, and keep only the best alignment of a given read. Both reads in a pair must align consistently (or else the alignments are discarded). Next, solely for the purposes of this step, we form a unipath graph from these reads (along with the patch), using a low K value (20). Then we unroll each read as a sequence of these unipaths, and assign coordinates to each unipath in the sequence, relative to the natural coordinates on the patch. This defines pairs (u,p) consisting of a unipath u at position p on the patch. If two such pairs have the same u and nearly the same p (within 5), we identify them, thus defining an equivalence relation. Next we form a graph whose vertices are equivalence classes of pairs, and whose edges are defined by the succession of unipaths in the unrolling of some read. Then we trim this graph by chewing back sources and sinks that do not correspond to the patch ends. Then we further edit the graph to choose branches in cases where one has much better coverage than the other. At the end of this editing process, if the graph is not a line, then we declare the editing process to have failed, and present the unimproved patch to the next part of the code. Otherwise, the graph is a line, and may thus be translated into a DNA sequence, which we take to be the improved patch.

(h) Patch insertion. The patches are now inserted into the unipath graph.

Details for step II.1, representation of long reads as sequences of unipaths.

1. Setup. Using the patched unipaths, we again compute matches, form them into clusters, and filter the clusters as above.
2. Graph construction. For each long read, we next form a directed graph whose vertices are the clusters as defined above. We create an edge from one cluster to another if their unipaths overlap by K-1 bases and the two clusters share a match that supports that overlap. Then we assign a weight to the edge as follows. We take the match for the first cluster that is rightmost on the read, then find the match for that read position in the second cluster. This defines the left end of an interval on the read and the left end of an interval on the unipath associated to the second cluster. Then we take the match for the second cluster that is rightmost for the read. This defines the right end of the interval on the read and the right end of the interval for the unipath associated to the second cluster. We then use the Smith-Waterman algorithm to align these two intervals, using penalties of one for each substitution and one for each indel base, penalizing in the same way to the extent that the ends of the two intervals are not concordant in the alignment. This penalty is the edge weight.
3. Optimal paths. We next define the ‘optimal’ paths through the graph. To do this we find each source and sink in the graph, and for each (source, sink) pair, find a path from the source to the sink that has the lowest total edge weight, using Dijkstra's algorithm. We note that there may be more than one ‘winning’ path between a given source and sink, in which case the algorithm picks one for us (effectively at random). Next to each (source, sink) pair we associate the total number of matches in the winning path that was chosen. We now drop from consideration all pairs/paths that have a suboptimal number of matches. Next, for the remaining pairs/paths, we exclude those having suboptimal total edge weights. The remaining paths are declared optimal.

Details for strep II.2, consensus of unipath sequences. The ‘consensus’ sequences are obtained through an indirect process, as follows:

1. Cores. Each long read may define multiple paths (sequences of unipaths) that are optimal. We reduce each such set to a single and more reliable ‘core’ that is defined to be the longest subsequence common to all of the multiple sequences. The typical relationship of the multiple sequences to their core is that they consist of the core, together with a very small number of unipaths tacked onto one or both ends.

(b) Illegal sequences. As detailed below, based on coverage, we identify certain sequences of unipaths that are believed to be non-genomic, and that are branded illegal. This is used in (d), below. Note that this information has to be used carefully, because complex repetitive regions will be preferentially enriched for illegal unipath sequences.

For this purpose, given a sequence of unipaths, we define its *coverage* by taking all cores that *subsume* that sequence of unipaths (and extending on both ends by at least one more unipath), computing the number of L-mer matches of the associated long reads to the unipath sequence, and then dividing by the number of L-mers in the unipath sequence. Note that by this definition, the more kmers are in a sequence of unipaths, the harder it is to cover.

We next define the *baseline coverage*, by taking the median coverage of all single unipaths having between 300 and 500 kmers. We do not use very short unipaths because they would be preferentially wrong (because wrong unipaths are nearly always short), and we do not use very long unipaths because they are harder to cover fully (and indeed not covered at all for very long unipaths, which can be hundreds of kb long).

We now consider candidate unipath sequences that we test for illegality. We exclude sequences longer than 1000 kmers or having more than 20 unipaths. We compute the coverage of the unipath sequences, and compare to the baseline. However two adjustments are necessary to make this a fair comparison: (i) we adjust for length: sequences having more kmers are less likely to be seen, in accordance with the decreased prevalence of long reads; (ii) we adjust for complexity: a sequence u1,...,un which has many unipaths in it is less likely to be covered because for a given long read, for each i, the overlap between ui and ui+1 (which consists of K-1 bases) would have to have subsumed a perfect L-mer match to the read. This adjustment is accomplished by a simulation that predicts the fraction of potential reads that would be lost due to a lack of L-mer matches.

Finally, if the coverage of a given unipath sequence is less than 50% of the baseline coverage (adjusted for sampling variability), we declare it illegal.

We also use the fragment read data to define a set of illegal sequences, as follows. Each ‘super-read’ from a fragment read pair defines a sequence of unipaths. We scan these sequences to predict highly improbable unipath sequences and append them to the illegal list.

We note that each incorrect inclusion of a unipath sequence in the illegal set will result in an assembly error.

(c) Bubble cleaning. For long reads that traverse complex repeat regions, correct translation into a sequence of unipaths is particularly error prone. Indeed there are many opportunities to ‘make the wrong choice’ for a read, so their associated unipath sequences tend to be incorrect. To partially correct for this, we examine bubbles in the reads, which by definition are ‘competing’ unipath sequences x,a1,...,am,y and x,b1,..,bn,y that share the same ends. We score these in an attempt to determine if one is ‘wrong’, and in that case translate each instance in the reads to the ‘right’ version. Of course it is possible that both are right (*i.e.* present in the genome) or that both are wrong. We proceed by going back to the graph for each read, and computing the penalty that would be incurred by switching paths. In some cases it is not possible at all, in which case the penalty is infinite. For each read traversing one of the sequences, we then use these penalties to assign a score, so that positive scores corresponding to favoring the first sequence, zero scores correspond to indifference, and negative scores correspond to favoring the second sequence. Let p be the number of positive scores and let n be the number of negative scores, and let r be the ratio Max(p,n)/Min(p,n). So long as r exceeds an arbitrary large threshold (chosen to be 12), we declare the losing alternative to be ‘wrong’ and convert all instances of it in the reads to the winning alternative. As with incorrect inclusions in the illegal set, we note that conversion of ‘right’ versions at this stage will result in assembly errors. There is obviously some risk that a correct alternative will be ‘overwritten’ simply because its prevalence in the genome is very low. This is possible, however in bacterial genomes such events are likely to be infrequent, and we accept the risk.

(d) Neighborhoods. For each unipath u of size above a minimum threshold (taken to be 30 kmers), we now form left and right ‘neighborhoods’ of u. The two cases are symmetric. In the ‘right’ case, we find cores that extend u to the right, stopping as soon as d extra kmers have been accumulated, where d is taken to be 600. (If the error rate of the data were reduced, d could be increased.) These right extensions of u define candidates for a ‘right neighborhood’ of u. We next eliminate any candidates containing one or more illegal sequences (as defined above). Next we score the candidates based on (a) the number of cores that contain the candidate; (b) the number of cores that align to the given candidate; (c) the complexity of the candidate (candidates containing many unipaths get a boost, because they tend to be underrepresented). We note that for (b), we do not filter the aligning cores to remove those containing illegal sequences, as this would exacerbate biases against correct representation of reads in repeat regions. Candidates scoring less than 5% of the best scoring candidate are removed.

(e) Hard filtering. We now proceed under the hypothesis that the systems of left and right neighborhoods are complete, *i.e.* contain all true neighborhoods in the genome (possibly plus some false neighborhoods). Assuming this, we impose strict compatibility conditions. Namely, given a left or right neighborhood n that is true, and given any unipath v in n, then there must exist both left and right neighborhoods of v that align exactly to n. If this is not the case, then we declare n to be false, and delete it from the neighborhood set. This process is iterated until no further deletions occur.

(f) Supplementing the neighborhoods. The system of neighborhoods thus described can benefit from supplementation by longer sequences. Let K2 = 640. In brief, we look for sequences of overlapping unipaths that bridge between unipaths u1 and u2 of size ≥ 1000 (here called *studs*), and such that every contiguous subsequence of length ≥ 2*K2 kmers is contained in a core. These sequences are filtered to remove those of low coverage. We also exclude cases where the neighborhoods already provide a path from u1 to u2 along minimum overlaps ≥ K2. These sequences are added to the neighborhoods. Note that for purposes of this calculation, if for a given stud we cannot reach right to another stud, we reduce K2 and repeat the calculation. The surviving neighborhoods plus the supplements are now treated as the ‘consensus’ of the unipath sequences from the long reads.

Details for step III.1, linking unipaths. Alignment of the jumping pairs now defines links between the large K unipaths. Given two unipaths u1 and u2, we can determine a set of read pairs that link these two unipaths such that the first and second read of each pair align to each unipath respectively. These read pairs may belong to multiple libraries (although in this work there is usually just one). Let denote the distribution of fragment sizes for a given library, which we estimate by calculating the end-to-end span of read pairs that land on long unipaths.

Given all the read pairs, this distribution, and the position of the reads on the unipaths, we can estimate the separation between two unipaths (gap size) and the standard error of the gap size estimate using a Bayesian statistical model. The model takes into account the wide fragment size distributions and unevenness of coverage.

In this model, for one observed linking pair, the probability of starting at distance from the right end of unipath u1 and stopping at distance from the left end of unipath u2, given separation *d* between the unipaths


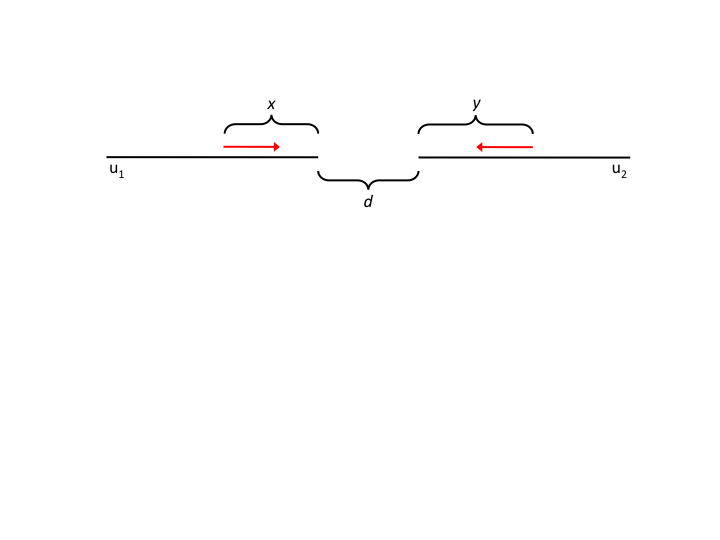


is assumed to be

where and are the read coverages at the starting and stopping positions, respectively; is the fragment distribution function of the library to which the reads belong; and

is the normalization factor. When there are linking pairs from the same library, we can assume that positions of each pair are independent, and the probability of observing these positions is

We then use Bayesian statistics to derive the probability of gap size given the observation of linking positions as follows,

Here we assume that the prior probability function of gap size is uniformly distributed in , where is the maximum overlap between the two unipaths and is the maximum fragment size observed from the libraries. We calculate the maximum unipath overlap using a heuristic kmer matching approach: we first list all possible kmer matches between the two unipaths, each implying an overlap ; then we calculate the maximum of under condition that at least kmer hits are found within 10% of .

Using the calculated distribution, we can compute the mean and standard deviation of the gap size.

Details for step III.2, scaffolding. Now we build a new graph whose vertices are the large K = 640 unipaths (excluding those that are very small) and for which edges are defined by a selected subset of the links. In selecting these links we have two goals: first, to avoid false (non-genomic) links, and second, to avoid linking to repeats, provided that it is possible to link over the repeat to unique sequence. This is complicated by uncertainty regarding what sequences are repeated in the genome. For example, suppose the genome consists of one chromosome and one plasmid, and on average each cell has more than one copy of the plasmid. Suppose now that a given unipath has a read density twice as high as average. We would not know if this is because the unipath appears twice on the chromosome (hence being repeated), or once on the plasmid. Moreover since in general there can be multiple plasmids, each having different copy numbers, and this information is unknown at the outset of the assembly process, it is particularly difficult to distinguish repeat from non-repeat unipaths.

To work around this difficulty, the algorithm proceeds by examining *relative* copy number. More specifically, if unipath u links to unipath v, and the read density of v exceeds 1.5 times the read density of u, we treat v as a ‘suspect’ repeat, and will preferentially link from u to another unipath w, provided that one exists. However, to avoid false links, we exclude any such link for which (a) there is no path from u to w through the small K unipaths, and (b) the number of pairs supporting the link is less than 5.

Details for step III.3, replacement of links by sequence.

1. Closing gaps. We now examine each edge in the scaffold graph, and attempt to close it (i.e. find the intervening sequence), allowing for more than one closure. To do this we find all paths through the large K unipath graph whose length is within 10 standard deviations of the expected length; we then exclude those paths that are more than 6 standard deviations worse than the path whose length is closest to the expected value. We note that while being off by 6 standard deviations is in principle highly improbable, in practice there are outliers, and the assumption that they do not exist would lead to misassemblies. See also model recalibration, below.
2. Filtering closures using jumps. If one closure leads to a better placement of jump pairs on the assembly than another, we exclude the less well supported closure. More specifically, let n1 be the number of jump pairs that support the first closure (and not the second), and let n2 be the number of jump pairs that support the second closure (and not the first). If n1 ≥ 2 and n1 ≥ 4*n2, then we exclude the second closure.
3. Filtering closures using long reads. If one closure is supported by at least 5 long reads, then we delete all closures that are supported by none.

Details for step III.4, final assembly generation.

1. Duplication removal. The assembly thus generated will represent ‘both strands’ of the genome. In most cases it is possible (and desirable) to delete one copy, and we do so as follows. First, if there are entire connected components whose reverse complement is present as a separate component, we delete one. Second, we color vertices in the assembly ‘blue’ and ‘red’ in such a way that opposite strands have opposite colors and so that blues and reds are in contiguous blocks where possible. If we find that the blues are all connected to each other, the reds are all connected to each other, and the blues are connected to the reds, then we delete all the red vertices.
2. Model recalibration. As a consequence of imperfections in the gap computation model (step III.1), some gap estimates are off by an improbable number of standard deviations. Here we devise a heuristic to compensate for this, so that we can know when closures of a gap are ‘too far off’ from their expected value. To do this, for all original gaps between unipaths that are now unambiguously closed in the assembly, we compute the error in the original gap estimate (from step III.1), measured in standard deviations. Typically this yields ~100 measurements. We sort these measurements, take the 90% percentile, and multiply by 1.5. Then for all ambiguities in the assembly graph, we discard all closures whose length is off by more than that number of deviations.
3. Definition of the assembly. This process yields a graph assembly, examples of which are exhibited in Fig. 2. Although an effort is underway to develop a new assembly format into which such a data structure might be translated, no representation is currently available. We therefore disintegrate the graph, breaking it minimally so as to form it into linear stretches, each of which can then be represented as a FASTA record. This constitutes the final assembly that is generated now by ALLPATHS-LG. To avoid confounding the definition of what the assembly is, we have turned off all the standard post-processing in ALLPATHS-LG, which would close some gaps and discard some small and/or repetitive contigs.

**Supplemental Analysis. Cost model for sequencing, assembling and finishing a bacterial genome**

Here we describe two cost models for generating a bacterial genome assembly: 1) Our new method for automated assembly using a combination of Illumina and Pacific Biosciences sequencing data; 2) The existing paradigm based on automated assembly using Illumina sequencing data that is then manually finished by targeted PCR using Sanger sequencing data.

The following assumptions are made:

1. The genome size of a bacterium is 5 Mb.
2. There are an average of 50 gaps in a 50x 180 bp fragment and 50x ~3 kb jumping Illumina 101 base paired-end read ALLPATHS-LG assembly. This is based on results over the past 6 months with ~300 genomes.
3. The same Illumina sequence data model is used for both models, namely 50x fragment and 50x ~3 kb jumping reads data from 101 base paired end reads.
4. Library construction and sequencing costs assume using Illumina reagents (TruSeq DNA Sample Prep Kit (v2), Mate Pair Library Prep Kit (v2), TruSeq SBS Kit v3-HS and TruSeq PE Cluster Kit v3-cBot-HS) plus any other required consumables (e.g. DNA shearing tubes, PCR plates, tips, qPCR, ‘gels’ etc).
5. Sequencing costs assume that pools of 96 fragment and 96 jumping libraries are sequenced in individual Illumina HiSeq lanes.
6. HiSeq machine amortization costs per run assume 1 run every 11 days, 365 working days per year (11 day run time includes nonworking days) for 3 years.
7. Pacific Biosciences sequencing runs using version 2 (V2) chemistry yield on average 20-30x coverage of a 5 Mb genome. This is based on our experience over the past 4 months with V2 chemistry. Accordingly, we budgeted 3 runs to obtain the desired 50x coverage.
8. Library construction and sequencing costs for Pacific Biosciences data generation assume using Pacific Biosciences reagents (DNA Template Prep Kit 2.0, DNA/Polymerase Binding Kit 2.0, DNA Sequencing Kit 2.0, DNA Control Complex 2.0 and SMRT Cell) and any other required consumables (e.g. DNA shearing tubes, PCR plates, tips, etc).
9. Pacific Biosciences RS machine amortization costs per run assume 8 runs per day (90 minute run time), 235 working days per year for 3 years.
10. For manual PCR and Sanger sequencing for finishing we assumed that 70% of gaps in the assembly will require 2 PCR amplicons/4 Sanger reads for closure, 20% of gaps will require 6 PCR amplicons/12 Sanger reads for closure and 10% of gaps will require 9 PCR amplicons/18 Sanger reads for closure. In addition to gaps the model assumes that another 40 amplicons/80 reads will be used to investigate misassemblies. Laboratory finishing costs assume standard costs for PCR (e.g. primers, polymerase), gels, PCR clean up, ABI BigDye terminators sequencing and other required consumables (e.g. PCR plates, tips, etc). Informatics finishing costs include primer design, incorporation of Sanger sequencing data and manual inspection of assembly to identify and fix misassemblies. This is based on our experience over 10 years.
11. All costs are direct. Reagent costs are based on current list prices. Labor costs are based on local hourly rates for computational and laboratory staff assuming 235 working days a year, 8 hours/day. Labor costs do not include fringe benefits.

**Summary of costs**

1. Illumina sample preparation and sequencing for both models = $1,668
2. Assembly costs for both models = $80
3. Pacific Biosciences sample preparation and sequencing costs = $1,365
4. Manual finishing costs = $13,123

**Detailed costs**

**1. Illumina sample preparation and sequencing**

| **Item** | **Unit cost** | **Number of units** | **Total cost** |
| --- | --- | --- | --- |
| 180 bp fragment library construction reagents | $73 | 1 | $73 |
| 3 kb jumping library construction reagents | $420 | 1 | $420 |
| HiSeq 101b paired end flowcell run reagents | $12,675 | 0.02* | $264 |
| Machine costs per run | $7,000 | 0.02* | $146 |
| Laboratory labor (1 hour) | $32 | 24 | $766 |
| *assumes 8 lanes per run and using 1/48 lane total |  | **Total** | **$1,669** |
| Same costs for both models.  **2. Genome assembly** |  |  |  |
| **Item** | **Unit cost** | **Number of units** | **Total cost** |
| Informatics labor (1 hour) | $40 | 2 | **$80** |

Same costs for both models.

**3. Pacific Biosciences sample preparation and sequencing**

| **Item** | **Unit cost** | **Number of units** | **Total cost** |
| --- | --- | --- | --- |
| Library construction reagents | $250 | 1 | $250 |
| Run reagents | $120 | 3 | $360 |
| Machine cost per run | $124 | 3 | $372 |
| Laboratory labor (1 hour) | $32 | 12 | $383 |
|  |  | **Total** | **$1,365** |

1. **Manual finishing**

| **Item** | **Unit cost** | **Number of units** | **Total cost** |
| --- | --- | --- | --- |
| ‘PCR + sequencing' reagents | $5 | 480 | $2,400 |
| Laboratory labor (1 hour) | $32 | 96 | $3,064 |
| Informatics labor (1 hour) | $40 | 192 | $7,660 |
|  |  | **Total** | **$13,124** |

**Supplemental Table 5. Accession information for Illumina data**

| **Organism** | **Library Type** | **Fraction Used** | **Library** | **Submission Accession** | **Study Accession** | **Experiment Accession** | **Run Accession** | **Receptacle Barcode** |
| --- | --- | --- | --- | --- | --- | --- | --- | --- |
| Bacteroides eggerthii 1_2_48FAA | fragment | 0.290 | Solexa-36226 | SRA010999 | SRP001878 | SRX116998 | SRR401308 | B03C5ABXX |
| Bacteroides eggerthii 1_2_48FAA | jumping | 0.170 | Solexa-62929 | SRA010999 | SRP001878 | SRX116999 | SRR401309 | C01ELABXX |
| Bacteroides fragilis CL05T00C42 | fragment | 0.180 | Pond-62019 | SRA038458 | SRP007226 | SRX101989 | SRR357365 | B091AABXX |
| Bacteroides fragilis CL05T00C42 | jumping | 1.000 | Solexa-62404 | SRA038458 | SRP007226 | SRX101990 | SRR357366 | B08YJABXX |
| Bacteroides thetaiotaomicron CL09T03C10 | fragment | 0.160 | Pond-62028 | SRA038462 | SRP007230 | SRX101999 | SRR357376 | B091AABXX |
| Bacteroides thetaiotaomicron CL09T03C10 | jumping | 1.000 | Solexa-62400 | SRA038462 | SRP007230 | SRX102000 | SRR357377 | B08YJABXX |
| Bifidobacterium bifidum NCIMB 41171 | fragment | 0.278 | Solexa-36232 | SRA008546 | SRP001660 | SRX116995 | SRR401318 | B03C5ABXX |
| Bifidobacterium bifidum NCIMB 41171 | jumping | 0.560 | Solexa-44947 | SRA008546 | SRP001660 | SRX117498 | SRR401844 | 801G2ABXX |
| Coprobacillus sp. D6 | fragment | 0.120 | Pond-62002 | SRA008546 | SRP001666 | SRX104191 | SRR360862 | B084DABXX |
| Coprobacillus sp. D6 | jumping | 0.200 | Solexa-62886 | SRA008546 | SRP001666 | SRX104192 | SRR360863 | B08YJABXX |
| E. coli MG1655 | fragment | 0.088 | Solexa-25396 | SRA009386 | SRP001087 | SRX131033 | SRR447685 | 207GVABXX |
| E. coli MG1655 | jumping | 1.000 | Solexa-44956 | SRA009386 | SRP001087 | SRX117481 | SRR401827 | 801G2ABXX |
| E. coli MG1655 | jumping | 1.000 | Solexa-42866 | SRA009386 | SRP001087 | SRX145082 | SRR492488 | 80528ABXX |
| Enterococcus casseliflavus 899205 | fragment | 0.170 | Pond-62020 | SRA003078 | SRP000361 | SRX104483 | SRR361847 | B084DABXX |
| Enterococcus casseliflavus 899205 | jumping | 0.210 | Solexa-62905 | SRA003078 | SRP000361 | SRX104484 | SRR361848 | B08YJABXX |
| Eubacterium sp. 3_1_31 | fragment | 0.187 | Solexa-36238 | SRA038469 | SRP007237 | SRX104072 | SRR360482 | 80528ABXX |
| Eubacterium sp. 3_1_31 | jumping | 0.412 | Solexa-44951 | SRA038469 | SRP007237 | SRX104069 | SRR360474 | 801G2ABXX |
| Fusobacterium nucleatum ss animalis OT 420 | fragment | 0.150 | Pond-61999 | SRA038465 | SRP007233 | SRX102005 | SRR357382 | B091AABXX |
| Fusobacterium nucleatum ss animalis OT 420 | jumping | 0.320 | Solexa-62391 | SRA038465 | SRP007233 | SRX102006 | SRR357383 | B08YJABXX |
| Fusobacterium sp. 7_1 | fragment | 0.080 | Pond-62035 | SRA008546 | SRP001679 | SRX104485 | SRR361849 | B084DABXX |
| Fusobacterium sp. 7_1 | jumping | 0.130 | Solexa-62891 | SRA008546 | SRP001679 | SRX110629 | SRR388178 | B08YJABXX |
| Klebsiella oxytoca 10-5248 | fragment | 0.200 | Pond-56350 | SRA030924 | SRP006189 | SRX013268 | SRR157503 | 702B4ABXX |
| Klebsiella oxytoca 10-5248 | jumping | 1.000 | Solexa-54911 | SRA030924 | SRP006189 | SRX101577 | SRR353924 | B03C5ABXX |
| Neisseria gonorrhoeae FA19 | fragment | 0.300 | Pond-62014 | SRA002064 | SRP000269 | SRX104118 | SRR360675 | B084DABXX |
| Neisseria gonorrhoeae FA19 | jumping | 0.180 | Solexa-62896 | SRA002064 | SRP000269 | SRX110628 | SRR388177 | B08YJABXX |
| Neisseria gonorrhoeae MS11 | fragment | 0.320 | Pond-62030 | SRA002037 | SRP000263 | SRX111074 | SRR388771 | B084DABXX |
| Neisseria gonorrhoeae MS11 | jumping | 0.210 | Solexa-62895 | SRA002037 | SRP000263 | SRX111073 | SRR388770 | B08YJABXX |
| Rhodobacter sphaeroides 2.4.1 | fragment | 0.384 | Solexa-11749 | SRA009378 | SRP001079 | SRX000946 | SRR125492 | 3031HAAXX |
| Rhodobacter sphaeroides 2.4.1 | jumping | 1.000 | Solexa-62923 | SRA009378 | SRP001079 | SRX111018 | SRR388672 | C01ELABXX |
| Scardovia wiggsiae F0424 | fragment | 0.210 | Pond-62017 | SRA038463 | SRP007231 | SRX102001 | SRR357378 | B091AABXX |
| Scardovia wiggsiae F0424 | jumping | 0.360 | Solexa-62392 | SRA038463 | SRP007231 | SRX102002 | SRR357379 | B08YJABXX |
| Streptococcus pneumoniae Tigr4 | fragment | 0.187 | Solexa-36223 | SRA048045 | SRP009303 | SRX110128 | SRR387335 | B03C5ABXX |
| Streptococcus pneumoniae Tigr4 | jumping | 0.558 | Solexa-44969 | SRA048045 | SRP009303 | SRX105406 | SRR364158 | 801G2ABXX |

**Supplemental Table 5**. Accession information for Illumina data. Organism: organism name including strain. Library Type: fragment (paired end) or sheared jumping (mate pair). Fraction Used: randomly selected fraction of read pairs used for the assembly. Library: internal library identifier. Submission Accession: NCBI Short Read Archive submission accession number. Study Accession: NCBI Short Read Archive study accession number. Experiment Accession: NCBI Short Read Archive experiment accession number. Run Accession: NCBI Short Read Archive run accession number. Receptacle Barcode: internal Illumina flowcell identifier.

**Supplemental Table 6. Accession information for Pacific Biosciences data**

| **Organism** | **Library** | **Submission Accession** | **Study Accession** | **Experiment Accession** | **Run Accession** | **Receptacle Barcode** |
| --- | --- | --- | --- | --- | --- | --- |
| Bacteroides eggerthii 1_2_48FAA | LR_93_Beggerthii | SRA010999 | SRP001878 | SRX131412 | SRR448134 | 03162012_8cell_1.A01.1 |
| Bacteroides eggerthii 1_2_48FAA | LR_93_Beggerthii | SRA010999 | SRP001878 | SRX131412 | SRR448138 | 03162012_8cell_1.A01.2 |
| Bacteroides eggerthii 1_2_48FAA | LR_93_Beggerthii | SRA010999 | SRP001878 | SRX131411 | SRR448136 | 03162012_8cell_1.B01.1 |
| Bacteroides eggerthii 1_2_48FAA | LR_93_Beggerthii | SRA010999 | SRP001878 | SRX131411 | SRR448133 | 03162012_8cell_1.B01.2 |
| Bacteroides eggerthii 1_2_48FAA | LR_93_Beggerthii | SRA010999 | SRP001878 | SRX131410 | SRR448132 | 03162012_8cell_1.C01.1 |
| Bacteroides eggerthii 1_2_48FAA | LR_93_Beggerthii | SRA010999 | SRP001878 | SRX131410 | SRR448135 | 03162012_8cell_1.C01.2 |
| Bacteroides eggerthii 1_2_48FAA | LR_93_Beggerthii | SRA010999 | SRP001878 | SRX131409 | SRR448131 | 03162012_8cell_1.D01.1 |
| Bacteroides eggerthii 1_2_48FAA | LR_93_Beggerthii | SRA010999 | SRP001878 | SRX131409 | SRR448137 | 03162012_8cell_1.D01.2 |
| Bacteroides fragilis CL05T00C42 | LR_95_Bfragilis | SRA038458 | SRP007226 | SRX109869 | SRR386324 | 07062011_8cell.A01.1 |
| Bacteroides fragilis CL05T00C42 | LR_95_Bfragilis | SRA038458 | SRP007226 | SRX109869 | SRR386305 | 07062011_8cell.A01.1 |
| Bacteroides fragilis CL05T00C42 | LR_95_Bfragilis | SRA038458 | SRP007226 | SRX109869 | SRR386300 | 07062011_8cell.A01.3 |
| Bacteroides fragilis CL05T00C42 | LR_95_Bfragilis | SRA038458 | SRP007226 | SRX109869 | SRR386304 | 07062011_8cell.A01.3 |
| Bacteroides fragilis CL05T00C42 | LR_95_Bfragilis | SRA038458 | SRP007226 | SRX109869 | SRR386328 | 07062011_8cell.A01.4 |
| Bacteroides fragilis CL05T00C42 | LR_95_Bfragilis | SRA038458 | SRP007226 | SRX109869 | SRR386313 | 07062011_8cell.A01.4 |
| Bacteroides fragilis CL05T00C42 | LR_95_Bfragilis | SRA038458 | SRP007226 | SRX109869 | SRR386307 | 07062011_8cell.A01.6 |
| Bacteroides fragilis CL05T00C42 | LR_95_Bfragilis | SRA038458 | SRP007226 | SRX109869 | SRR386308 | 07062011_8cell.A01.6 |
| Bacteroides fragilis CL05T00C42 | LR_95_Bfragilis | SRA038458 | SRP007226 | SRX109869 | SRR386329 | 07062011_8cell.A01.8 |
| Bacteroides fragilis CL05T00C42 | LR_95_Bfragilis | SRA038458 | SRP007226 | SRX109869 | SRR386317 | 07062011_8cell.A01.8 |
| Bacteroides fragilis CL05T00C42 | LR_95_Bfragilis | SRA038458 | SRP007226 | SRX109868 | SRR386327 | 07072011_8cell.A01.1 |
| Bacteroides fragilis CL05T00C42 | LR_95_Bfragilis | SRA038458 | SRP007226 | SRX109868 | SRR386303 | 07072011_8cell.A01.1 |
| Bacteroides fragilis CL05T00C42 | LR_95_Bfragilis | SRA038458 | SRP007226 | SRX109868 | SRR386302 | 07072011_8cell.A01.2 |
| Bacteroides fragilis CL05T00C42 | LR_95_Bfragilis | SRA038458 | SRP007226 | SRX109868 | SRR386319 | 07072011_8cell.A01.2 |
| Bacteroides fragilis CL05T00C42 | LR_95_Bfragilis | SRA038458 | SRP007226 | SRX109868 | SRR386312 | 07072011_8cell.A01.3 |
| Bacteroides fragilis CL05T00C42 | LR_95_Bfragilis | SRA038458 | SRP007226 | SRX109868 | SRR386323 | 07072011_8cell.A01.3 |
| Bacteroides fragilis CL05T00C42 | LR_95_Bfragilis | SRA038458 | SRP007226 | SRX109868 | SRR386315 | 07072011_8cell.A01.4 |
| Bacteroides fragilis CL05T00C42 | LR_95_Bfragilis | SRA038458 | SRP007226 | SRX109868 | SRR386314 | 07072011_8cell.A01.4 |
| Bacteroides fragilis CL05T00C42 | LR_95_Bfragilis | SRA038458 | SRP007226 | SRX109868 | SRR386310 | 07072011_8cell.A01.5 |
| Bacteroides fragilis CL05T00C42 | LR_95_Bfragilis | SRA038458 | SRP007226 | SRX109868 | SRR386306 | 07072011_8cell.A01.5 |
| Bacteroides fragilis CL05T00C42 | LR_95_Bfragilis | SRA038458 | SRP007226 | SRX109868 | SRR386320 | 07072011_8cell.A01.6 |
| Bacteroides fragilis CL05T00C42 | LR_95_Bfragilis | SRA038458 | SRP007226 | SRX109868 | SRR386309 | 07072011_8cell.A01.6 |
| Bacteroides fragilis CL05T00C42 | LR_95_Bfragilis | SRA038458 | SRP007226 | SRX109868 | SRR386298 | 07072011_8cell.A01.7 |
| Bacteroides fragilis CL05T00C42 | LR_95_Bfragilis | SRA038458 | SRP007226 | SRX109868 | SRR386301 | 07072011_8cell.A01.7 |
| Bacteroides fragilis CL05T00C42 | LR_95_Bfragilis | SRA038458 | SRP007226 | SRX109868 | SRR386316 | 07072011_8cell.A01.8 |
| Bacteroides fragilis CL05T00C42 | LR_95_Bfragilis | SRA038458 | SRP007226 | SRX109868 | SRR386325 | 07072011_8cell.A01.8 |
| Bacteroides thetaiotaomicron CL09T03C10 | LR_94_Bthetaiotaomicron | SRA038462 | SRP007230 | SRX109872 | SRR386366 | 06302011_8cell.A01.1 |
| Bacteroides thetaiotaomicron CL09T03C10 | LR_94_Bthetaiotaomicron | SRA038462 | SRP007230 | SRX109872 | SRR386364 | 06302011_8cell.A01.1 |
| Bacteroides thetaiotaomicron CL09T03C10 | LR_94_Bthetaiotaomicron | SRA038462 | SRP007230 | SRX109872 | SRR386343 | 06302011_8cell.A01.2 |
| Bacteroides thetaiotaomicron CL09T03C10 | LR_94_Bthetaiotaomicron | SRA038462 | SRP007230 | SRX109872 | SRR386360 | 06302011_8cell.A01.2 |
| Bacteroides thetaiotaomicron CL09T03C10 | LR_94_Bthetaiotaomicron | SRA038462 | SRP007230 | SRX109872 | SRR386341 | 06302011_8cell.A01.3 |
| Bacteroides thetaiotaomicron CL09T03C10 | LR_94_Bthetaiotaomicron | SRA038462 | SRP007230 | SRX109872 | SRR386336 | 06302011_8cell.A01.3 |
| Bacteroides thetaiotaomicron CL09T03C10 | LR_94_Bthetaiotaomicron | SRA038462 | SRP007230 | SRX109872 | SRR386365 | 06302011_8cell.A01.4 |
| Bacteroides thetaiotaomicron CL09T03C10 | LR_94_Bthetaiotaomicron | SRA038462 | SRP007230 | SRX109872 | SRR386353 | 06302011_8cell.A01.4 |
| Bacteroides thetaiotaomicron CL09T03C10 | LR_94_Bthetaiotaomicron | SRA038462 | SRP007230 | SRX109872 | SRR386349 | 06302011_8cell.A01.5 |
| Bacteroides thetaiotaomicron CL09T03C10 | LR_94_Bthetaiotaomicron | SRA038462 | SRP007230 | SRX109872 | SRR386356 | 06302011_8cell.A01.5 |
| Bacteroides thetaiotaomicron CL09T03C10 | LR_94_Bthetaiotaomicron | SRA038462 | SRP007230 | SRX109872 | SRR386372 | 06302011_8cell.A01.6 |
| Bacteroides thetaiotaomicron CL09T03C10 | LR_94_Bthetaiotaomicron | SRA038462 | SRP007230 | SRX109872 | SRR386338 | 06302011_8cell.A01.6 |
| Bacteroides thetaiotaomicron CL09T03C10 | LR_94_Bthetaiotaomicron | SRA038462 | SRP007230 | SRX109872 | SRR386337 | 06302011_8cell.A01.7 |
| Bacteroides thetaiotaomicron CL09T03C10 | LR_94_Bthetaiotaomicron | SRA038462 | SRP007230 | SRX109872 | SRR386334 | 06302011_8cell.A01.7 |
| Bacteroides thetaiotaomicron CL09T03C10 | LR_94_Bthetaiotaomicron | SRA038462 | SRP007230 | SRX109872 | SRR386344 | 06302011_8cell.A01.8 |
| Bacteroides thetaiotaomicron CL09T03C10 | LR_94_Bthetaiotaomicron | SRA038462 | SRP007230 | SRX109872 | SRR386371 | 06302011_8cell.A01.8 |
| Bifidobacterium bifidum NCIMB 41171 | LR_58_Bbifidum | SRA008546 | SRP001660 | SRX109852 | SRR386118 | 02102011_PM_6cell.B01.1 |
| Bifidobacterium bifidum NCIMB 41171 | LR_58_Bbifidum | SRA008546 | SRP001660 | SRX109852 | SRR386243 | 02102011_PM_6cell.B01.1 |
| Bifidobacterium bifidum NCIMB 41171 | LR_58_Bbifidum | SRA008546 | SRP001660 | SRX109852 | SRR386209 | 02102011_PM_6cell.B01.2 |
| Bifidobacterium bifidum NCIMB 41171 | LR_58_Bbifidum | SRA008546 | SRP001660 | SRX109852 | SRR386185 | 02102011_PM_6cell.B01.2 |
| Bifidobacterium bifidum NCIMB 41171 | LR_58_Bbifidum | SRA008546 | SRP001660 | SRX109852 | SRR386232 | 02102011_PM_6cell.B01.3 |
| Bifidobacterium bifidum NCIMB 41171 | LR_58_Bbifidum | SRA008546 | SRP001660 | SRX109852 | SRR386147 | 02102011_PM_6cell.B01.3 |
| Bifidobacterium bifidum NCIMB 41171 | LR_84_Bbifidum | SRA008546 | SRP001660 | SRX109862 | SRR386262 | 04222011_12cell_3.A01.1 |
| Bifidobacterium bifidum NCIMB 41171 | LR_84_Bbifidum | SRA008546 | SRP001660 | SRX109862 | SRR386248 | 04222011_12cell_3.A01.1 |
| Coprobacillus sp. D6 | PACBIO-50 | SRA008546 | SRP001666 | SRX131407 | SRR448082 | 03042012_8cell_1.A01.1 |
| Coprobacillus sp. D6 | PACBIO-50 | SRA008546 | SRP001666 | SRX131407 | SRR448078 | 03042012_8cell_1.B01.1 |
| Coprobacillus sp. D6 | PACBIO-50 | SRA008546 | SRP001666 | SRX131407 | SRR448077 | 03042012_8cell_1.C01.1 |
| Coprobacillus sp. D6 | PACBIO-50 | SRA008546 | SRP001666 | SRX131407 | SRR448085 | 03042012_8cell_1.D01.1 |
| Coprobacillus sp. D6 | PACBIO-51 | SRA008546 | SRP001666 | SRX131406 | SRR448076 | 03042012_8cell_1.E01.1 |
| Coprobacillus sp. D6 | PACBIO-51 | SRA008546 | SRP001666 | SRX131406 | SRR448079 | 03042012_8cell_1.F01.1 |
| Coprobacillus sp. D6 | PACBIO-51 | SRA008546 | SRP001666 | SRX131406 | SRR448086 | 03042012_8cell_1.G01.1 |
| Coprobacillus sp. D6 | PACBIO-51 | SRA008546 | SRP001666 | SRX131406 | SRR448084 | 03042012_8cell_1.H01.1 |
| E. coli MG1655 | LR_71_Ecoli_5Kb | SRA009386 | SRP001087 | SRX109917 | SRR387034 | 03102011_AM_9cell.C01.1 |
| E. coli MG1655 | LR_71_Ecoli_5Kb | SRA009386 | SRP001087 | SRX109917 | SRR387153 | 03102011_AM_9cell.C01.1 |
| E. coli MG1655 | LR_71_Ecoli_5Kb | SRA009386 | SRP001087 | SRX109917 | SRR387030 | 03102011_AM_9cell.C01.2 |
| E. coli MG1655 | LR_71_Ecoli_5Kb | SRA009386 | SRP001087 | SRX109917 | SRR386936 | 03102011_AM_9cell.C01.2 |
| E. coli MG1655 | LR_71_Ecoli_5Kb | SRA009386 | SRP001087 | SRX109917 | SRR387096 | 03102011_AM_9cell.C01.3 |
| E. coli MG1655 | LR_71_Ecoli_5Kb | SRA009386 | SRP001087 | SRX109917 | SRR386972 | 03102011_AM_9cell.C01.3 |
| E. coli MG1655 | LR_70_Ecoli_4Kb | SRA009386 | SRP001087 | SRX109901 | SRR386913 | 03112011_9cell.B01.2 |
| E. coli MG1655 | LR_70_Ecoli_4Kb | SRA009386 | SRP001087 | SRX109901 | SRR387092 | 03112011_9cell.B01.2 |
| E. coli MG1655 | LR_70_Ecoli_4Kb | SRA009386 | SRP001087 | SRX109901 | SRR386907 | 03112011_9cell.B01.3 |
| E. coli MG1655 | LR_70_Ecoli_4Kb | SRA009386 | SRP001087 | SRX109901 | SRR387035 | 03112011_9cell.B01.3 |
| E. coli MG1655 | LR_71_Ecoli_5Kb | SRA009386 | SRP001087 | SRX109936 | SRR387067 | 03112011_9cell.C01.1 |
| E. coli MG1655 | LR_71_Ecoli_5Kb | SRA009386 | SRP001087 | SRX109936 | SRR387124 | 03112011_9cell.C01.1 |
| E. coli MG1655 | LR_71_Ecoli_5Kb | SRA009386 | SRP001087 | SRX109936 | SRR387004 | 03112011_9cell.C01.2 |
| E. coli MG1655 | LR_71_Ecoli_5Kb | SRA009386 | SRP001087 | SRX109936 | SRR387066 | 03112011_9cell.C01.2 |
| E. coli MG1655 | LR_71_Ecoli_5Kb | SRA009386 | SRP001087 | SRX109936 | SRR387147 | 03112011_9cell.C01.3 |
| E. coli MG1655 | LR_71_Ecoli_5Kb | SRA009386 | SRP001087 | SRX109936 | SRR387130 | 03112011_9cell.C01.3 |
| Enterococcus casseliflavus 899205 | LR_89_Ecasseliflavus | SRA003078 | SRP000361 | SRX109797 | SRR385958 | 06132011_8cell.D01.2 |
| Enterococcus casseliflavus 899205 | LR_89_Ecasseliflavus | SRA003078 | SRP000361 | SRX109797 | SRR386011 | 06132011_8cell.D01.2 |
| Enterococcus casseliflavus 899205 | LR_89_Ecasseliflavus | SRA003078 | SRP000361 | SRX109797 | SRR385965 | 06132011_8cell.D01.3 |
| Enterococcus casseliflavus 899205 | LR_89_Ecasseliflavus | SRA003078 | SRP000361 | SRX109797 | SRR385992 | 06132011_8cell.D01.3 |
| Enterococcus casseliflavus 899205 | LR_89_Ecasseliflavus | SRA003078 | SRP000361 | SRX109797 | SRR386004 | 06132011_8cell.D01.4 |
| Enterococcus casseliflavus 899205 | LR_89_Ecasseliflavus | SRA003078 | SRP000361 | SRX109797 | SRR385998 | 06132011_8cell.D01.4 |
| Enterococcus casseliflavus 899205 | LR_89_Ecasseliflavus | SRA003078 | SRP000361 | SRX109797 | SRR386027 | 06132011_8cell.D01.5 |
| Enterococcus casseliflavus 899205 | LR_89_Ecasseliflavus | SRA003078 | SRP000361 | SRX109797 | SRR385990 | 06132011_8cell.D01.5 |
| Enterococcus casseliflavus 899205 | LR_89_Ecasseliflavus_SMRT_hook | SRA003078 | SRP000361 | SRX109793 | SRR386030 | 09022011_8cell.B01.1 |
| Enterococcus casseliflavus 899205 | LR_89_Ecasseliflavus_SMRT_hook | SRA003078 | SRP000361 | SRX109793 | SRR385960 | 09022011_8cell.B01.1 |
| Enterococcus casseliflavus 899205 | LR_89_Ecasseliflavus_SMRT_hook | SRA003078 | SRP000361 | SRX109793 | SRR385978 | 09022011_8cell.B01.2 |
| Enterococcus casseliflavus 899205 | LR_89_Ecasseliflavus_SMRT_hook | SRA003078 | SRP000361 | SRX109793 | SRR386015 | 09022011_8cell.B01.2 |
| Enterococcus casseliflavus 899205 | LR_89_Ecasseliflavus_SMRT_hook | SRA003078 | SRP000361 | SRX109793 | SRR386002 | 09022011_8cell.B01.3 |
| Enterococcus casseliflavus 899205 | LR_89_Ecasseliflavus_SMRT_hook | SRA003078 | SRP000361 | SRX109793 | SRR385956 | 09022011_8cell.B01.3 |
| Enterococcus casseliflavus 899205 | LR_89_Ecasseliflavus_SMRT_hook | SRA003078 | SRP000361 | SRX109793 | SRR385975 | 09022011_8cell.B01.4 |
| Enterococcus casseliflavus 899205 | LR_89_Ecasseliflavus_SMRT_hook | SRA003078 | SRP000361 | SRX109793 | SRR385982 | 09022011_8cell.B01.4 |
| Enterococcus casseliflavus 899205 | LR_89_Ecasseliflavus_SMRT_hook | SRA003078 | SRP000361 | SRX109793 | SRR385964 | 09022011_8cell.B01.5 |
| Enterococcus casseliflavus 899205 | LR_89_Ecasseliflavus_SMRT_hook | SRA003078 | SRP000361 | SRX109793 | SRR386005 | 09022011_8cell.B01.5 |
| Enterococcus casseliflavus 899205 | LR_89_Ecasseliflavus_SMRT_hook | SRA003078 | SRP000361 | SRX109793 | SRR386026 | 09022011_8cell.B01.7 |
| Enterococcus casseliflavus 899205 | LR_89_Ecasseliflavus_SMRT_hook | SRA003078 | SRP000361 | SRX109793 | SRR385953 | 09022011_8cell.B01.7 |
| Enterococcus casseliflavus 899205 | LR_118_Ecasseliflavus | SRA003078 | SRP000361 | SRX109794 | SRR386023 | 09142011_8cell_2.A01.1 |
| Enterococcus casseliflavus 899205 | LR_118_Ecasseliflavus | SRA003078 | SRP000361 | SRX109794 | SRR386007 | 09142011_8cell_2.A01.1 |
| Enterococcus casseliflavus 899205 | LR_118_Ecasseliflavus | SRA003078 | SRP000361 | SRX109794 | SRR385988 | 09142011_8cell_2.A01.2 |
| Enterococcus casseliflavus 899205 | LR_118_Ecasseliflavus | SRA003078 | SRP000361 | SRX109794 | SRR386025 | 09142011_8cell_2.A01.2 |
| Enterococcus casseliflavus 899205 | LR_118_Ecasseliflavus | SRA003078 | SRP000361 | SRX109794 | SRR385954 | 09142011_8cell_2.A01.3 |
| Enterococcus casseliflavus 899205 | LR_118_Ecasseliflavus | SRA003078 | SRP000361 | SRX109794 | SRR385968 | 09142011_8cell_2.A01.3 |
| Enterococcus casseliflavus 899205 | LR_118_Ecasseliflavus | SRA003078 | SRP000361 | SRX109794 | SRR386003 | 09142011_8cell_2.A01.4 |
| Enterococcus casseliflavus 899205 | LR_118_Ecasseliflavus | SRA003078 | SRP000361 | SRX109794 | SRR385974 | 09142011_8cell_2.A01.4 |
| Enterococcus casseliflavus 899205 | LR_118_Ecasseliflavus | SRA003078 | SRP000361 | SRX109794 | SRR386009 | 09142011_8cell_2.A01.6 |
| Enterococcus casseliflavus 899205 | LR_118_Ecasseliflavus | SRA003078 | SRP000361 | SRX109794 | SRR386018 | 09142011_8cell_2.A01.6 |
| Enterococcus casseliflavus 899205 | LR_118_Ecasseliflavus | SRA003078 | SRP000361 | SRX109794 | SRR385972 | 09142011_8cell_2.A01.7 |
| Enterococcus casseliflavus 899205 | LR_118_Ecasseliflavus | SRA003078 | SRP000361 | SRX109794 | SRR385981 | 09142011_8cell_2.A01.7 |
| Enterococcus casseliflavus 899205 | LR_118_Ecasseliflavus | SRA003078 | SRP000361 | SRX109794 | SRR385959 | 09142011_8cell_2.A01.8 |
| Enterococcus casseliflavus 899205 | LR_118_Ecasseliflavus | SRA003078 | SRP000361 | SRX109794 | SRR386008 | 09142011_8cell_2.A01.8 |
| Enterococcus casseliflavus 899205 | LR_118_Ecasseliflavus_1.5nM | SRA003078 | SRP000361 | SRX109795 | SRR385984 | 09162011_5cell.A01.1 |
| Enterococcus casseliflavus 899205 | LR_118_Ecasseliflavus_1.5nM | SRA003078 | SRP000361 | SRX109795 | SRR385986 | 09162011_5cell.A01.1 |
| Enterococcus casseliflavus 899205 | LR_118_Ecasseliflavus_1.5nM | SRA003078 | SRP000361 | SRX109795 | SRR385979 | 09162011_5cell.A01.2 |
| Enterococcus casseliflavus 899205 | LR_118_Ecasseliflavus_1.5nM | SRA003078 | SRP000361 | SRX109795 | SRR385955 | 09162011_5cell.A01.2 |
| Enterococcus casseliflavus 899205 | LR_118_Ecasseliflavus_1.5nM | SRA003078 | SRP000361 | SRX109795 | SRR386032 | 09162011_5cell.A01.3 |
| Enterococcus casseliflavus 899205 | LR_118_Ecasseliflavus_1.5nM | SRA003078 | SRP000361 | SRX109795 | SRR386024 | 09162011_5cell.A01.3 |
| Enterococcus casseliflavus 899205 | LR_118_Ecasseliflavus_1.5nM | SRA003078 | SRP000361 | SRX109795 | SRR386020 | 09162011_5cell.A01.4 |
| Enterococcus casseliflavus 899205 | LR_118_Ecasseliflavus_1.5nM | SRA003078 | SRP000361 | SRX109795 | SRR386001 | 09162011_5cell.A01.4 |
| Enterococcus casseliflavus 899205 | LR_118_Ecasseliflavus_1.5nM | SRA003078 | SRP000361 | SRX109795 | SRR385995 | 09162011_5cell.A01.5 |
| Enterococcus casseliflavus 899205 | LR_118_Ecasseliflavus_1.5nM | SRA003078 | SRP000361 | SRX109795 | SRR385977 | 09162011_5cell.A01.5 |
| Eubacterium sp. 3_1_31 | LR_86_Eubacterum | SRA038469 | SRP007237 | SRX109954 | SRR386560 | 04272011_8cell.A01.1 |
| Eubacterium sp. 3_1_31 | LR_86_Eubacterum | SRA038469 | SRP007237 | SRX109954 | SRR386545 | 04272011_8cell.A01.1 |
| Eubacterium sp. 3_1_31 | LR_86_Eubacterum | SRA038469 | SRP007237 | SRX109954 | SRR386581 | 04272011_8cell.A01.2 |
| Eubacterium sp. 3_1_31 | LR_86_Eubacterum | SRA038469 | SRP007237 | SRX109954 | SRR386587 | 04272011_8cell.A01.2 |
| Eubacterium sp. 3_1_31 | LR_86_Eubacterum | SRA038469 | SRP007237 | SRX109954 | SRR386585 | 04272011_8cell.A01.3 |
| Eubacterium sp. 3_1_31 | LR_86_Eubacterum | SRA038469 | SRP007237 | SRX109954 | SRR386568 | 04272011_8cell.A01.3 |
| Eubacterium sp. 3_1_31 | LR_86_Eubacterum | SRA038469 | SRP007237 | SRX109954 | SRR386565 | 04272011_8cell.A01.4 |
| Eubacterium sp. 3_1_31 | LR_86_Eubacterum | SRA038469 | SRP007237 | SRX109954 | SRR386571 | 04272011_8cell.A01.4 |
| Eubacterium sp. 3_1_31 | LR_86_Eubacterum | SRA038469 | SRP007237 | SRX109954 | SRR386547 | 04272011_8cell.A01.5 |
| Eubacterium sp. 3_1_31 | LR_86_Eubacterum | SRA038469 | SRP007237 | SRX109954 | SRR386552 | 04272011_8cell.A01.5 |
| Eubacterium sp. 3_1_31 | LR_86_Eubacterum | SRA038469 | SRP007237 | SRX109954 | SRR386564 | 04272011_8cell.A01.6 |
| Eubacterium sp. 3_1_31 | LR_86_Eubacterum | SRA038469 | SRP007237 | SRX109954 | SRR386578 | 04272011_8cell.A01.6 |
| Eubacterium sp. 3_1_31 | LR_86_Eubacterum | SRA038469 | SRP007237 | SRX109954 | SRR386583 | 04272011_8cell.A01.7 |
| Eubacterium sp. 3_1_31 | LR_86_Eubacterum | SRA038469 | SRP007237 | SRX109954 | SRR386572 | 04272011_8cell.A01.7 |
| Eubacterium sp. 3_1_31 | LR_86_Eubacterum | SRA038469 | SRP007237 | SRX109954 | SRR386555 | 04272011_8cell.A01.8 |
| Eubacterium sp. 3_1_31 | LR_86_Eubacterum | SRA038469 | SRP007237 | SRX109954 | SRR386569 | 04272011_8cell.A01.8 |
| Fusobacterium nucleatum ss animalis OT 420 | LR_107_Fnucleatum | SRA038465 | SRP007233 | SRX109804 | SRR386499 | 07112011_8cell.A01.1 |
| Fusobacterium nucleatum ss animalis OT 420 | LR_107_Fnucleatum | SRA038465 | SRP007233 | SRX109804 | SRR386502 | 07112011_8cell.A01.1 |
| Fusobacterium nucleatum ss animalis OT 420 | LR_107_Fnucleatum | SRA038465 | SRP007233 | SRX109804 | SRR386494 | 07112011_8cell.A01.2 |
| Fusobacterium nucleatum ss animalis OT 420 | LR_107_Fnucleatum | SRA038465 | SRP007233 | SRX109804 | SRR386508 | 07112011_8cell.A01.2 |
| Fusobacterium nucleatum ss animalis OT 420 | LR_107_Fnucleatum | SRA038465 | SRP007233 | SRX109804 | SRR386530 | 07112011_8cell.A01.3 |
| Fusobacterium nucleatum ss animalis OT 420 | LR_107_Fnucleatum | SRA038465 | SRP007233 | SRX109804 | SRR386505 | 07112011_8cell.A01.3 |
| Fusobacterium nucleatum ss animalis OT 420 | LR_107_Fnucleatum | SRA038465 | SRP007233 | SRX109804 | SRR386511 | 07112011_8cell.A01.4 |
| Fusobacterium nucleatum ss animalis OT 420 | LR_107_Fnucleatum | SRA038465 | SRP007233 | SRX109804 | SRR386531 | 07112011_8cell.A01.4 |
| Fusobacterium nucleatum ss animalis OT 420 | LR_107_Fnucleatum | SRA038465 | SRP007233 | SRX109804 | SRR386498 | 07112011_8cell.A01.5 |
| Fusobacterium nucleatum ss animalis OT 420 | LR_107_Fnucleatum | SRA038465 | SRP007233 | SRX109804 | SRR386510 | 07112011_8cell.A01.5 |
| Fusobacterium nucleatum ss animalis OT 420 | LR_107_Fnucleatum | SRA038465 | SRP007233 | SRX109804 | SRR386540 | 07112011_8cell.A01.6 |
| Fusobacterium nucleatum ss animalis OT 420 | LR_107_Fnucleatum | SRA038465 | SRP007233 | SRX109804 | SRR386509 | 07112011_8cell.A01.6 |
| Fusobacterium nucleatum ss animalis OT 420 | LR_107_Fnucleatum | SRA038465 | SRP007233 | SRX109804 | SRR386534 | 07112011_8cell.A01.7 |
| Fusobacterium nucleatum ss animalis OT 420 | LR_107_Fnucleatum | SRA038465 | SRP007233 | SRX109804 | SRR386522 | 07112011_8cell.A01.7 |
| Fusobacterium nucleatum ss animalis OT 420 | LR_107_Fnucleatum | SRA038465 | SRP007233 | SRX109804 | SRR386527 | 07112011_8cell.A01.8 |
| Fusobacterium nucleatum ss animalis OT 420 | LR_107_Fnucleatum | SRA038465 | SRP007233 | SRX109804 | SRR386507 | 07112011_8cell.A01.8 |
| Fusobacterium nucleatum ss animalis OT 420 | LR_107_Fnucleatum | SRA038465 | SRP007233 | SRX109805 | SRR386539 | 07122011_8cell.A01.1 |
| Fusobacterium nucleatum ss animalis OT 420 | LR_107_Fnucleatum | SRA038465 | SRP007233 | SRX109805 | SRR386529 | 07122011_8cell.A01.1 |
| Fusobacterium nucleatum ss animalis OT 420 | LR_107_Fnucleatum | SRA038465 | SRP007233 | SRX109806 | SRR386526 | 07192011_8cell.A01.1 |
| Fusobacterium nucleatum ss animalis OT 420 | LR_107_Fnucleatum | SRA038465 | SRP007233 | SRX109806 | SRR386503 | 07192011_8cell.A01.1 |
| Fusobacterium nucleatum ss animalis OT 420 | LR_107_Fnucleatum | SRA038465 | SRP007233 | SRX109806 | SRR386523 | 07192011_8cell.A01.2 |
| Fusobacterium nucleatum ss animalis OT 420 | LR_107_Fnucleatum | SRA038465 | SRP007233 | SRX109806 | SRR386504 | 07192011_8cell.A01.2 |
| Fusobacterium nucleatum ss animalis OT 420 | LR_107_Fnucleatum | SRA038465 | SRP007233 | SRX109806 | SRR386521 | 07192011_8cell.A01.3 |
| Fusobacterium nucleatum ss animalis OT 420 | LR_107_Fnucleatum | SRA038465 | SRP007233 | SRX109806 | SRR386517 | 07192011_8cell.A01.3 |
| Fusobacterium nucleatum ss animalis OT 420 | LR_107_Fnucleatum | SRA038465 | SRP007233 | SRX109806 | SRR386497 | 07192011_8cell.A01.4 |
| Fusobacterium nucleatum ss animalis OT 420 | LR_107_Fnucleatum | SRA038465 | SRP007233 | SRX109806 | SRR386496 | 07192011_8cell.A01.4 |
| Fusobacterium nucleatum ss animalis OT 420 | LR_107_Fnucleatum | SRA038465 | SRP007233 | SRX109806 | SRR386532 | 07192011_8cell.A01.5 |
| Fusobacterium nucleatum ss animalis OT 420 | LR_107_Fnucleatum | SRA038465 | SRP007233 | SRX109806 | SRR386506 | 07192011_8cell.A01.5 |
| Fusobacterium nucleatum ss animalis OT 420 | LR_107_Fnucleatum | SRA038465 | SRP007233 | SRX109806 | SRR386515 | 07192011_8cell.A01.6 |
| Fusobacterium nucleatum ss animalis OT 420 | LR_107_Fnucleatum | SRA038465 | SRP007233 | SRX109806 | SRR386541 | 07192011_8cell.A01.6 |
| Fusobacterium nucleatum ss animalis OT 420 | LR_107_Fnucleatum | SRA038465 | SRP007233 | SRX109806 | SRR386520 | 07192011_8cell.A01.7 |
| Fusobacterium nucleatum ss animalis OT 420 | LR_107_Fnucleatum | SRA038465 | SRP007233 | SRX109806 | SRR386513 | 07192011_8cell.A01.7 |
| Fusobacterium nucleatum ss animalis OT 420 | LR_107_Fnucleatum | SRA038465 | SRP007233 | SRX109806 | SRR386516 | 07192011_8cell.A01.8 |
| Fusobacterium nucleatum ss animalis OT 420 | LR_107_Fnucleatum | SRA038465 | SRP007233 | SRX109806 | SRR386501 | 07192011_8cell.A01.8 |
| Fusobacterium sp. 7_1 | LR_88_Fusobacterium | SRA008546 | SRP001679 | SRX109858 | SRR386207 | 05272011_8cell.A01.5 |
| Fusobacterium sp. 7_1 | LR_88_Fusobacterium | SRA008546 | SRP001679 | SRX109858 | SRR386125 | 05272011_8cell.A01.5 |
| Fusobacterium sp. 7_1 | LR_88_Fusobacterium | SRA008546 | SRP001679 | SRX109858 | SRR386216 | 05272011_8cell.A01.6 |
| Fusobacterium sp. 7_1 | LR_88_Fusobacterium | SRA008546 | SRP001679 | SRX109858 | SRR386268 | 05272011_8cell.A01.6 |
| Fusobacterium sp. 7_1 | LR_88_Fusobacterium | SRA008546 | SRP001679 | SRX109858 | SRR386170 | 05272011_8cell.A01.7 |
| Fusobacterium sp. 7_1 | LR_88_Fusobacterium | SRA008546 | SRP001679 | SRX109858 | SRR386240 | 05272011_8cell.A01.7 |
| Fusobacterium sp. 7_1 | LR_88_Fusobacterium | SRA008546 | SRP001679 | SRX109858 | SRR386134 | 05272011_8cell.A01.8 |
| Fusobacterium sp. 7_1 | LR_88_Fusobacterium | SRA008546 | SRP001679 | SRX109858 | SRR386229 | 05272011_8cell.A01.8 |
| Fusobacterium sp. 7_1 | LR_88_Fusobacterium | SRA008546 | SRP001679 | SRX109859 | SRR386152 | 05312011_8cell.A01.1 |
| Fusobacterium sp. 7_1 | LR_88_Fusobacterium | SRA008546 | SRP001679 | SRX109859 | SRR386244 | 05312011_8cell.A01.1 |
| Fusobacterium sp. 7_1 | LR_88_Fusobacterium | SRA008546 | SRP001679 | SRX109859 | SRR386168 | 05312011_8cell.A01.2 |
| Fusobacterium sp. 7_1 | LR_88_Fusobacterium | SRA008546 | SRP001679 | SRX109859 | SRR386252 | 05312011_8cell.A01.2 |
| Fusobacterium sp. 7_1 | LR_88_Fusobacterium | SRA008546 | SRP001679 | SRX109859 | SRR386127 | 05312011_8cell.A01.3 |
| Fusobacterium sp. 7_1 | LR_88_Fusobacterium | SRA008546 | SRP001679 | SRX109859 | SRR386191 | 05312011_8cell.A01.3 |
| Fusobacterium sp. 7_1 | LR_88_Fusobacterium | SRA008546 | SRP001679 | SRX109859 | SRR386203 | 05312011_8cell.A01.4 |
| Fusobacterium sp. 7_1 | LR_88_Fusobacterium | SRA008546 | SRP001679 | SRX109859 | SRR386199 | 05312011_8cell.A01.4 |
| Fusobacterium sp. 7_1 | LR_88_Fusobacterium | SRA008546 | SRP001679 | SRX109859 | SRR386208 | 05312011_8cell.A01.5 |
| Fusobacterium sp. 7_1 | LR_88_Fusobacterium | SRA008546 | SRP001679 | SRX109859 | SRR386128 | 05312011_8cell.A01.5 |
| Fusobacterium sp. 7_1 | LR_88_Fusobacterium | SRA008546 | SRP001679 | SRX109859 | SRR386223 | 05312011_8cell.A01.6 |
| Fusobacterium sp. 7_1 | LR_88_Fusobacterium | SRA008546 | SRP001679 | SRX109859 | SRR386292 | 05312011_8cell.A01.6 |
| Fusobacterium sp. 7_1 | LR_88_Fusobacterium | SRA008546 | SRP001679 | SRX109867 | SRR386270 | 06012011_8cell.A01.1 |
| Fusobacterium sp. 7_1 | LR_88_Fusobacterium | SRA008546 | SRP001679 | SRX109867 | SRR386293 | 06012011_8cell.A01.1 |
| Fusobacterium sp. 7_1 | LR_88_Fusobacterium | SRA008546 | SRP001679 | SRX109867 | SRR386257 | 06012011_8cell.A01.2 |
| Fusobacterium sp. 7_1 | LR_88_Fusobacterium | SRA008546 | SRP001679 | SRX109867 | SRR386260 | 06012011_8cell.A01.2 |
| Fusobacterium sp. 7_1 | LR_88_Fusobacterium | SRA008546 | SRP001679 | SRX109867 | SRR386167 | 06012011_8cell.A01.3 |
| Fusobacterium sp. 7_1 | LR_88_Fusobacterium | SRA008546 | SRP001679 | SRX109867 | SRR386224 | 06012011_8cell.A01.3 |
| Fusobacterium sp. 7_1 | LR_88_Fusobacterium | SRA008546 | SRP001679 | SRX109867 | SRR386178 | 06012011_8cell.A01.4 |
| Fusobacterium sp. 7_1 | LR_88_Fusobacterium | SRA008546 | SRP001679 | SRX109867 | SRR386161 | 06012011_8cell.A01.4 |
| Fusobacterium sp. 7_1 | LR_88_Fusobacterium | SRA008546 | SRP001679 | SRX109866 | SRR386278 | 06032011_8cell.A01.1 |
| Fusobacterium sp. 7_1 | LR_88_Fusobacterium | SRA008546 | SRP001679 | SRX109866 | SRR386269 | 06032011_8cell.A01.1 |
| Fusobacterium sp. 7_1 | LR_88_Fusobacterium | SRA008546 | SRP001679 | SRX109866 | SRR386206 | 06032011_8cell.A01.2 |
| Fusobacterium sp. 7_1 | LR_88_Fusobacterium | SRA008546 | SRP001679 | SRX109866 | SRR386261 | 06032011_8cell.A01.2 |
| Fusobacterium sp. 7_1 | LR_88_Fusobacterium | SRA008546 | SRP001679 | SRX109866 | SRR386212 | 06032011_8cell.A01.3 |
| Fusobacterium sp. 7_1 | LR_88_Fusobacterium | SRA008546 | SRP001679 | SRX109866 | SRR386164 | 06032011_8cell.A01.3 |
| Fusobacterium sp. 7_1 | LR_88_Fusobacterium | SRA008546 | SRP001679 | SRX109866 | SRR386169 | 06032011_8cell.A01.4 |
| Fusobacterium sp. 7_1 | LR_88_Fusobacterium | SRA008546 | SRP001679 | SRX109866 | SRR386197 | 06032011_8cell.A01.4 |
| Fusobacterium sp. 7_1 | LR_88_Fusobacterium | SRA008546 | SRP001679 | SRX109866 | SRR386234 | 06032011_8cell.A01.5 |
| Fusobacterium sp. 7_1 | LR_88_Fusobacterium | SRA008546 | SRP001679 | SRX109866 | SRR386213 | 06032011_8cell.A01.5 |
| Fusobacterium sp. 7_1 | LR_88_Fusobacterium | SRA008546 | SRP001679 | SRX109866 | SRR386222 | 06032011_8cell.A01.6 |
| Fusobacterium sp. 7_1 | LR_88_Fusobacterium | SRA008546 | SRP001679 | SRX109866 | SRR386193 | 06032011_8cell.A01.6 |
| Fusobacterium sp. 7_1 | LR_88_Fusobacterium | SRA008546 | SRP001679 | SRX109866 | SRR386273 | 06032011_8cell.A01.7 |
| Fusobacterium sp. 7_1 | LR_88_Fusobacterium | SRA008546 | SRP001679 | SRX109866 | SRR386158 | 06032011_8cell.A01.7 |
| Fusobacterium sp. 7_1 | LR_88_Fusobacterium | SRA008546 | SRP001679 | SRX109866 | SRR386246 | 06032011_8cell.A01.8 |
| Fusobacterium sp. 7_1 | LR_88_Fusobacterium | SRA008546 | SRP001679 | SRX109866 | SRR386218 | 06032011_8cell.A01.8 |
| Klebsiella oxytoca 10-5248 | LR_85_Koxytoca | SRA030924 | SRP006189 | SRX109803 | SRR386106 | 04222011_12cell_3.B01.1 |
| Klebsiella oxytoca 10-5248 | LR_85_Koxytoca | SRA030924 | SRP006189 | SRX109803 | SRR386105 | 04222011_12cell_3.B01.1 |
| Klebsiella oxytoca 10-5248 | LR_85_Koxytoca | SRA030924 | SRP006189 | SRX109803 | SRR386094 | 04222011_12cell_3.B01.2 |
| Klebsiella oxytoca 10-5248 | LR_85_Koxytoca | SRA030924 | SRP006189 | SRX109803 | SRR386115 | 04222011_12cell_3.B01.2 |
| Klebsiella oxytoca 10-5248 | LR_85_Koxytoca | SRA030924 | SRP006189 | SRX109803 | SRR386108 | 04222011_12cell_3.B01.3 |
| Klebsiella oxytoca 10-5248 | LR_85_Koxytoca | SRA030924 | SRP006189 | SRX109803 | SRR386112 | 04222011_12cell_3.B01.3 |
| Klebsiella oxytoca 10-5248 | LR_85_Koxytoca | SRA030924 | SRP006189 | SRX109803 | SRR386070 | 04222011_12cell_3.B01.4 |
| Klebsiella oxytoca 10-5248 | LR_85_Koxytoca | SRA030924 | SRP006189 | SRX109803 | SRR386090 | 04222011_12cell_3.B01.4 |
| Klebsiella oxytoca 10-5248 | LR_85_Koxytoca | SRA030924 | SRP006189 | SRX109803 | SRR386089 | 04222011_12cell_3.B01.5 |
| Klebsiella oxytoca 10-5248 | LR_85_Koxytoca | SRA030924 | SRP006189 | SRX109803 | SRR386109 | 04222011_12cell_3.B01.5 |
| Klebsiella oxytoca 10-5248 | LR_85_Koxytoca | SRA030924 | SRP006189 | SRX109803 | SRR386093 | 04222011_12cell_3.B01.6 |
| Klebsiella oxytoca 10-5248 | LR_85_Koxytoca | SRA030924 | SRP006189 | SRX109803 | SRR386111 | 04222011_12cell_3.B01.6 |
| Klebsiella oxytoca 10-5248 | LR_85_Koxytoca | SRA030924 | SRP006189 | SRX109801 | SRR386110 | 04252011_9cell_2.A01.1 |
| Klebsiella oxytoca 10-5248 | LR_85_Koxytoca | SRA030924 | SRP006189 | SRX109801 | SRR386085 | 04252011_9cell_2.A01.1 |
| Klebsiella oxytoca 10-5248 | LR_85_Koxytoca | SRA030924 | SRP006189 | SRX109801 | SRR386073 | 04252011_9cell_2.A01.2 |
| Klebsiella oxytoca 10-5248 | LR_85_Koxytoca | SRA030924 | SRP006189 | SRX109801 | SRR386099 | 04252011_9cell_2.A01.2 |
| Klebsiella oxytoca 10-5248 | LR_85_Koxytoca | SRA030924 | SRP006189 | SRX109801 | SRR386098 | 04252011_9cell_2.A01.3 |
| Klebsiella oxytoca 10-5248 | LR_85_Koxytoca | SRA030924 | SRP006189 | SRX109801 | SRR386066 | 04252011_9cell_2.A01.3 |
| Klebsiella oxytoca 10-5248 | LR_85_Koxytoca | SRA030924 | SRP006189 | SRX109801 | SRR386071 | 04252011_9cell_2.A01.4 |
| Klebsiella oxytoca 10-5248 | LR_85_Koxytoca | SRA030924 | SRP006189 | SRX109801 | SRR386113 | 04252011_9cell_2.A01.4 |
| Klebsiella oxytoca 10-5248 | LR_85_Koxytoca | SRA030924 | SRP006189 | SRX109801 | SRR386092 | 04252011_9cell_2.A01.5 |
| Klebsiella oxytoca 10-5248 | LR_85_Koxytoca | SRA030924 | SRP006189 | SRX109801 | SRR386076 | 04252011_9cell_2.A01.5 |
| Klebsiella oxytoca 10-5248 | LR_85_Koxytoca | SRA030924 | SRP006189 | SRX109800 | SRR386084 | 04262011_8cell.A01.6 |
| Klebsiella oxytoca 10-5248 | LR_85_Koxytoca | SRA030924 | SRP006189 | SRX109800 | SRR386077 | 04262011_8cell.A01.6 |
| Klebsiella oxytoca 10-5248 | LR_85_Koxytoca | SRA030924 | SRP006189 | SRX109800 | SRR386101 | 04262011_8cell.A01.7 |
| Klebsiella oxytoca 10-5248 | LR_85_Koxytoca | SRA030924 | SRP006189 | SRX109800 | SRR386074 | 04262011_8cell.A01.7 |
| Klebsiella oxytoca 10-5248 | LR_85_Koxytoca | SRA030924 | SRP006189 | SRX109800 | SRR386088 | 04262011_8cell.A01.8 |
| Klebsiella oxytoca 10-5248 | LR_85_Koxytoca | SRA030924 | SRP006189 | SRX109800 | SRR386081 | 04262011_8cell.A01.8 |
| Neisseria gonorrhoeae FA19 | LR_83_Ngonorrhoeae_FA19 | SRA002064 | SRP000269 | SRX110615 | SRR388138 | 05062011_8cell.A01.1 |
| Neisseria gonorrhoeae FA19 | LR_83_Ngonorrhoeae_FA19 | SRA002064 | SRP000269 | SRX110615 | SRR388124 | 05062011_8cell.A01.1 |
| Neisseria gonorrhoeae FA19 | LR_83_Ngonorrhoeae_FA19 | SRA002064 | SRP000269 | SRX110615 | SRR388126 | 05062011_8cell.A01.2 |
| Neisseria gonorrhoeae FA19 | LR_83_Ngonorrhoeae_FA19 | SRA002064 | SRP000269 | SRX110615 | SRR388140 | 05062011_8cell.A01.2 |
| Neisseria gonorrhoeae FA19 | LR_83_Ngonorrhoeae_FA19 | SRA002064 | SRP000269 | SRX110615 | SRR388127 | 05062011_8cell.A01.3 |
| Neisseria gonorrhoeae FA19 | LR_83_Ngonorrhoeae_FA19 | SRA002064 | SRP000269 | SRX110615 | SRR388139 | 05062011_8cell.A01.3 |
| Neisseria gonorrhoeae FA19 | LR_83_Ngonorrhoeae_FA19 | SRA002064 | SRP000269 | SRX110615 | SRR388118 | 05062011_8cell.A01.4 |
| Neisseria gonorrhoeae FA19 | LR_83_Ngonorrhoeae_FA19 | SRA002064 | SRP000269 | SRX110615 | SRR388129 | 05062011_8cell.A01.4 |
| Neisseria gonorrhoeae FA19 | LR_83_Ngonorrhoeae_FA19 | SRA002064 | SRP000269 | SRX110615 | SRR388141 | 05062011_8cell.A01.5 |
| Neisseria gonorrhoeae FA19 | LR_83_Ngonorrhoeae_FA19 | SRA002064 | SRP000269 | SRX110615 | SRR388132 | 05062011_8cell.A01.5 |
| Neisseria gonorrhoeae FA19 | LR_83_Ngonorrhoeae_FA19 | SRA002064 | SRP000269 | SRX110615 | SRR388135 | 05062011_8cell.A01.6 |
| Neisseria gonorrhoeae FA19 | LR_83_Ngonorrhoeae_FA19 | SRA002064 | SRP000269 | SRX110615 | SRR388125 | 05062011_8cell.A01.6 |
| Neisseria gonorrhoeae FA19 | LR_83_Ngonorrhoeae_FA19 | SRA002064 | SRP000269 | SRX110615 | SRR388136 | 05062011_8cell.A01.7 |
| Neisseria gonorrhoeae FA19 | LR_83_Ngonorrhoeae_FA19 | SRA002064 | SRP000269 | SRX110615 | SRR388137 | 05062011_8cell.A01.7 |
| Neisseria gonorrhoeae FA19 | LR_83_Ngonorrhoeae_FA19 | SRA002064 | SRP000269 | SRX110615 | SRR388133 | 05062011_8cell.A01.8 |
| Neisseria gonorrhoeae FA19 | LR_83_Ngonorrhoeae_FA19 | SRA002064 | SRP000269 | SRX110615 | SRR388131 | 05062011_8cell.A01.8 |
| Neisseria gonorrhoeae FA19 | LR_83_Ngonorroeae | SRA002064 | SRP000269 | SRX110614 | SRR388143 | 05162011_8cell.A01.1 |
| Neisseria gonorrhoeae FA19 | LR_83_Ngonorroeae | SRA002064 | SRP000269 | SRX110614 | SRR388142 | 05162011_8cell.A01.1 |
| Neisseria gonorrhoeae FA19 | LR_83_Ngonorroeae | SRA002064 | SRP000269 | SRX110614 | SRR388128 | 05162011_8cell.A01.2 |
| Neisseria gonorrhoeae FA19 | LR_83_Ngonorroeae | SRA002064 | SRP000269 | SRX110614 | SRR388117 | 05162011_8cell.A01.2 |
| Neisseria gonorrhoeae FA19 | LR_83_Ngonorrhoeae_FA19 | SRA002064 | SRP000269 | SRX110616 | SRR388134 | 05172011_6cell.A01.1 |
| Neisseria gonorrhoeae FA19 | LR_83_Ngonorrhoeae_FA19 | SRA002064 | SRP000269 | SRX110616 | SRR388120 | 05172011_6cell.A01.1 |
| Neisseria gonorrhoeae FA19 | LR_83_Ngonorrhoeae_FA19 | SRA002064 | SRP000269 | SRX110616 | SRR388119 | 05172011_6cell.A01.2 |
| Neisseria gonorrhoeae FA19 | LR_83_Ngonorrhoeae_FA19 | SRA002064 | SRP000269 | SRX110616 | SRR388122 | 05172011_6cell.A01.2 |
| Neisseria gonorrhoeae FA19 | LR_83_Ngonorrhoeae_FA19 | SRA002064 | SRP000269 | SRX110616 | SRR388123 | 05172011_6cell.A01.3 |
| Neisseria gonorrhoeae FA19 | LR_83_Ngonorrhoeae_FA19 | SRA002064 | SRP000269 | SRX110616 | SRR388130 | 05172011_6cell.A01.3 |
| Neisseria gonorrhoeae MS11 | LR_90_Ngonorrhoeae_MSII | SRA002037 | SRP000263 | SRX110931 | SRR388552 | 05232011_8cell.A01.1 |
| Neisseria gonorrhoeae MS11 | LR_90_Ngonorrhoeae_MSII | SRA002037 | SRP000263 | SRX110931 | SRR388561 | 05232011_8cell.A01.1 |
| Neisseria gonorrhoeae MS11 | LR_90_Ngonorrhoeae_MSII | SRA002037 | SRP000263 | SRX110931 | SRR388557 | 05232011_8cell.A01.2 |
| Neisseria gonorrhoeae MS11 | LR_90_Ngonorrhoeae_MSII | SRA002037 | SRP000263 | SRX110931 | SRR388532 | 05232011_8cell.A01.2 |
| Neisseria gonorrhoeae MS11 | LR_90_Ngonorrhoeae_MSII | SRA002037 | SRP000263 | SRX110931 | SRR388572 | 05232011_8cell.A01.3 |
| Neisseria gonorrhoeae MS11 | LR_90_Ngonorrhoeae_MSII | SRA002037 | SRP000263 | SRX110931 | SRR388574 | 05232011_8cell.A01.3 |
| Neisseria gonorrhoeae MS11 | LR_90_Ngonorrhoeae_MSII | SRA002037 | SRP000263 | SRX110931 | SRR388524 | 05232011_8cell.A01.4 |
| Neisseria gonorrhoeae MS11 | LR_90_Ngonorrhoeae_MSII | SRA002037 | SRP000263 | SRX110931 | SRR388565 | 05232011_8cell.A01.4 |
| Neisseria gonorrhoeae MS11 | LR_90_Ngonorrhoeae_MSII | SRA002037 | SRP000263 | SRX110931 | SRR388568 | 05232011_8cell.A01.5 |
| Neisseria gonorrhoeae MS11 | LR_90_Ngonorrhoeae_MSII | SRA002037 | SRP000263 | SRX110931 | SRR388548 | 05232011_8cell.A01.5 |
| Neisseria gonorrhoeae MS11 | LR_90_Ngonorrhoeae_MSII | SRA002037 | SRP000263 | SRX110931 | SRR388527 | 05232011_8cell.A01.6 |
| Neisseria gonorrhoeae MS11 | LR_90_Ngonorrhoeae_MSII | SRA002037 | SRP000263 | SRX110931 | SRR388536 | 05232011_8cell.A01.6 |
| Neisseria gonorrhoeae MS11 | LR_90_Ngonorrhoeae_MSII | SRA002037 | SRP000263 | SRX110931 | SRR388533 | 05232011_8cell.A01.7 |
| Neisseria gonorrhoeae MS11 | LR_90_Ngonorrhoeae_MSII | SRA002037 | SRP000263 | SRX110931 | SRR388566 | 05232011_8cell.A01.7 |
| Neisseria gonorrhoeae MS11 | LR_90_Ngonorrhoeae_MSII | SRA002037 | SRP000263 | SRX110931 | SRR388544 | 05232011_8cell.A01.8 |
| Neisseria gonorrhoeae MS11 | LR_90_Ngonorrhoeae_MSII | SRA002037 | SRP000263 | SRX110931 | SRR388528 | 05232011_8cell.A01.8 |
| Neisseria gonorrhoeae MS11 | LR_90_Ngonorrhoeae_MS11 | SRA002037 | SRP000263 | SRX110932 | SRR388538 | 05242011_8cell.A01.1 |
| Neisseria gonorrhoeae MS11 | LR_90_Ngonorrhoeae_MS11 | SRA002037 | SRP000263 | SRX110932 | SRR388543 | 05242011_8cell.A01.1 |
| Neisseria gonorrhoeae MS11 | LR_90_Ngonorrhoeae_MS11 | SRA002037 | SRP000263 | SRX110932 | SRR388534 | 05242011_8cell.A01.2 |
| Neisseria gonorrhoeae MS11 | LR_90_Ngonorrhoeae_MS11 | SRA002037 | SRP000263 | SRX110932 | SRR388562 | 05242011_8cell.A01.2 |
| Neisseria gonorrhoeae MS11 | LR_90_Ngonorrhoeae_MS11 | SRA002037 | SRP000263 | SRX110932 | SRR388573 | 05242011_8cell.A01.3 |
| Neisseria gonorrhoeae MS11 | LR_90_Ngonorrhoeae_MS11 | SRA002037 | SRP000263 | SRX110932 | SRR388549 | 05242011_8cell.A01.3 |
| Neisseria gonorrhoeae MS11 | LR_90_Ngonorrhoeae_MS11 | SRA002037 | SRP000263 | SRX110932 | SRR388553 | 05242011_8cell.A01.4 |
| Neisseria gonorrhoeae MS11 | LR_90_Ngonorrhoeae_MS11 | SRA002037 | SRP000263 | SRX110932 | SRR388567 | 05242011_8cell.A01.4 |
| Neisseria gonorrhoeae MS11 | LR_90_Ngonorrhoeae_MS11 | SRA002037 | SRP000263 | SRX110932 | SRR388551 | 05242011_8cell.A01.5 |
| Neisseria gonorrhoeae MS11 | LR_90_Ngonorrhoeae_MS11 | SRA002037 | SRP000263 | SRX110932 | SRR388569 | 05242011_8cell.A01.5 |
| Neisseria gonorrhoeae MS11 | LR_90_Ngonorrhoeae_MS11 | SRA002037 | SRP000263 | SRX110932 | SRR388535 | 05242011_8cell.A01.6 |
| Neisseria gonorrhoeae MS11 | LR_90_Ngonorrhoeae_MS11 | SRA002037 | SRP000263 | SRX110932 | SRR388559 | 05242011_8cell.A01.6 |
| Neisseria gonorrhoeae MS11 | LR_90_Ngonorrhoeae_MS11 | SRA002037 | SRP000263 | SRX110932 | SRR388554 | 05242011_8cell.A01.7 |
| Neisseria gonorrhoeae MS11 | LR_90_Ngonorrhoeae_MS11 | SRA002037 | SRP000263 | SRX110932 | SRR388558 | 05242011_8cell.A01.7 |
| Neisseria gonorrhoeae MS11 | LR_90_Ngonorrhoeae_MS11 | SRA002037 | SRP000263 | SRX110932 | SRR388525 | 05242011_8cell.A01.8 |
| Neisseria gonorrhoeae MS11 | LR_90_Ngonorrhoeae_MS11 | SRA002037 | SRP000263 | SRX110932 | SRR388526 | 05242011_8cell.A01.8 |
| Neisseria gonorrhoeae MS11 | LR_90_Ngonorrhoeae_MS11 | SRA002037 | SRP000263 | SRX110933 | SRR388547 | 05252011_8cell.A01.1 |
| Neisseria gonorrhoeae MS11 | LR_90_Ngonorrhoeae_MS11 | SRA002037 | SRP000263 | SRX110933 | SRR388539 | 05252011_8cell.A01.1 |
| Neisseria gonorrhoeae MS11 | LR_90_Ngonorrhoeae_MS11 | SRA002037 | SRP000263 | SRX110933 | SRR388546 | 05252011_8cell.A01.2 |
| Neisseria gonorrhoeae MS11 | LR_90_Ngonorrhoeae_MS11 | SRA002037 | SRP000263 | SRX110933 | SRR388560 | 05252011_8cell.A01.2 |
| Neisseria gonorrhoeae MS11 | LR_90_Ngonorrhoeae_MS11 | SRA002037 | SRP000263 | SRX110933 | SRR388575 | 05252011_8cell.A01.3 |
| Neisseria gonorrhoeae MS11 | LR_90_Ngonorrhoeae_MS11 | SRA002037 | SRP000263 | SRX110933 | SRR388570 | 05252011_8cell.A01.3 |
| Neisseria gonorrhoeae MS11 | LR_90_Ngonorrhoeae_MS11 | SRA002037 | SRP000263 | SRX110933 | SRR388529 | 05252011_8cell.A01.4 |
| Neisseria gonorrhoeae MS11 | LR_90_Ngonorrhoeae_MS11 | SRA002037 | SRP000263 | SRX110933 | SRR388530 | 05252011_8cell.A01.4 |
| Neisseria gonorrhoeae MS11 | LR_90_Ngonorrhoeae_MS11 | SRA002037 | SRP000263 | SRX110933 | SRR388542 | 05252011_8cell.A01.5 |
| Neisseria gonorrhoeae MS11 | LR_90_Ngonorrhoeae_MS11 | SRA002037 | SRP000263 | SRX110933 | SRR388540 | 05252011_8cell.A01.5 |
| Neisseria gonorrhoeae MS11 | LR_90_Ngonorrhoeae_MS11 | SRA002037 | SRP000263 | SRX110933 | SRR388571 | 05252011_8cell.A01.6 |
| Neisseria gonorrhoeae MS11 | LR_90_Ngonorrhoeae_MS11 | SRA002037 | SRP000263 | SRX110933 | SRR388556 | 05252011_8cell.A01.6 |
| Neisseria gonorrhoeae MS11 | LR_90_Ngonorrhoeae_MS11 | SRA002037 | SRP000263 | SRX110933 | SRR388555 | 05252011_8cell.A01.7 |
| Neisseria gonorrhoeae MS11 | LR_90_Ngonorrhoeae_MS11 | SRA002037 | SRP000263 | SRX110933 | SRR388550 | 05252011_8cell.A01.7 |
| Neisseria gonorrhoeae MS11 | LR_90_Ngonorrhoeae_MS11 | SRA002037 | SRP000263 | SRX110934 | SRR388537 | 05262011_10cell.B01.1 |
| Neisseria gonorrhoeae MS11 | LR_90_Ngonorrhoeae_MS11 | SRA002037 | SRP000263 | SRX110934 | SRR388564 | 05262011_10cell.B01.1 |
| Neisseria gonorrhoeae MS11 | LR_90_Ngonorrhoeae_MS11 | SRA002037 | SRP000263 | SRX110934 | SRR388541 | 05262011_10cell.B01.2 |
| Neisseria gonorrhoeae MS11 | LR_90_Ngonorrhoeae_MS11 | SRA002037 | SRP000263 | SRX110934 | SRR388545 | 05262011_10cell.B01.2 |
| Neisseria gonorrhoeae MS11 | LR_90_Ngonorrhoeae_MS11 | SRA002037 | SRP000263 | SRX110934 | SRR388531 | 05262011_10cell.B01.3 |
| Neisseria gonorrhoeae MS11 | LR_90_Ngonorrhoeae_MS11 | SRA002037 | SRP000263 | SRX110934 | SRR388563 | 05262011_10cell.B01.3 |
| Rhodobacter sphaeroides 2.4.1 | LR_55_Rsphaeroides | SRA009378 | SRP001079 | SRX109847 | SRR386702 | 01212011_AM_4cell.A01.4 |
| Rhodobacter sphaeroides 2.4.1 | LR_55_Rsphaeroides | SRA009378 | SRP001079 | SRX109812 | SRR386630 | 02092011_PM_5cell.A01.1 |
| Rhodobacter sphaeroides 2.4.1 | LR_55_Rsphaeroides | SRA009378 | SRP001079 | SRX109812 | SRR386654 | 02092011_PM_5cell.A01.1 |
| Rhodobacter sphaeroides 2.4.1 | LR_55_Rsphaeroides | SRA009378 | SRP001079 | SRX109812 | SRR386594 | 02092011_PM_5cell.A01.2 |
| Rhodobacter sphaeroides 2.4.1 | LR_55_Rsphaeroides | SRA009378 | SRP001079 | SRX109812 | SRR386699 | 02092011_PM_5cell.A01.2 |
| Rhodobacter sphaeroides 2.4.1 | LR_55_Rsphaeroides | SRA009378 | SRP001079 | SRX109812 | SRR386652 | 02092011_PM_5cell.A01.3 |
| Rhodobacter sphaeroides 2.4.1 | LR_55_Rsphaeroides | SRA009378 | SRP001079 | SRX109812 | SRR386727 | 02092011_PM_5cell.A01.3 |
| Rhodobacter sphaeroides 2.4.1 | LR_55_Rsphaeroides | SRA009378 | SRP001079 | SRX109812 | SRR386720 | 02092011_PM_5cell.A01.4 |
| Rhodobacter sphaeroides 2.4.1 | LR_55_Rsphaeroides | SRA009378 | SRP001079 | SRX109812 | SRR386622 | 02092011_PM_5cell.A01.4 |
| Rhodobacter sphaeroides 2.4.1 | LR_55_Rsphaeroides | SRA009378 | SRP001079 | SRX109812 | SRR386704 | 02092011_PM_5cell.A01.5 |
| Rhodobacter sphaeroides 2.4.1 | LR_55_Rsphaeroides | SRA009378 | SRP001079 | SRX109812 | SRR386752 | 02092011_PM_5cell.A01.5 |
| Rhodobacter sphaeroides 2.4.1 | LR_55_Rsphaeroides | SRA009378 | SRP001079 | SRX109830 | SRR386655 | 02162011_PM_6cell.A01.1 |
| Rhodobacter sphaeroides 2.4.1 | LR_55_Rsphaeroides | SRA009378 | SRP001079 | SRX109830 | SRR386648 | 02162011_PM_6cell.A01.1 |
| Rhodobacter sphaeroides 2.4.1 | LR_55_Rsphaeroides | SRA009378 | SRP001079 | SRX109830 | SRR386721 | 02162011_PM_6cell.A01.2 |
| Rhodobacter sphaeroides 2.4.1 | LR_55_Rsphaeroides | SRA009378 | SRP001079 | SRX109830 | SRR386724 | 02162011_PM_6cell.A01.2 |
| Rhodobacter sphaeroides 2.4.1 | LR_55_Rsphaeroides | SRA009378 | SRP001079 | SRX109830 | SRR386772 | 02162011_PM_6cell.A01.3 |
| Rhodobacter sphaeroides 2.4.1 | LR_55_Rsphaeroides | SRA009378 | SRP001079 | SRX109830 | SRR386620 | 02162011_PM_6cell.A01.3 |
| Rhodobacter sphaeroides 2.4.1 | LR_55_Rsphaeroides | SRA009378 | SRP001079 | SRX109830 | SRR386629 | 02162011_PM_6cell.A01.4 |
| Rhodobacter sphaeroides 2.4.1 | LR_55_Rsphaeroides | SRA009378 | SRP001079 | SRX109830 | SRR386760 | 02162011_PM_6cell.A01.4 |
| Rhodobacter sphaeroides 2.4.1 | LR_55_Rsphaeroides | SRA009378 | SRP001079 | SRX109830 | SRR386698 | 02162011_PM_6cell.A01.5 |
| Rhodobacter sphaeroides 2.4.1 | LR_55_Rsphaeroides | SRA009378 | SRP001079 | SRX109830 | SRR386649 | 02162011_PM_6cell.A01.5 |
| Rhodobacter sphaeroides 2.4.1 | LR_55_Rsphaeroides | SRA009378 | SRP001079 | SRX109830 | SRR386707 | 02162011_PM_6cell.A01.6 |
| Rhodobacter sphaeroides 2.4.1 | LR_55_Rsphaeroides | SRA009378 | SRP001079 | SRX109830 | SRR386730 | 02162011_PM_6cell.A01.6 |
| Rhodobacter sphaeroides 2.4.1 | LR_12_Rsphaeroides | SRA009378 | SRP001079 | SRX109818 | SRR386746 | 10072010_AM_4cell.A01.2 |
| Rhodobacter sphaeroides 2.4.1 | LR_111_Rsphaeroides | SRA009378 | SRP001079 | SRX111329 | SRR389125 | 09012011_8cell.A01.1 |
| Rhodobacter sphaeroides 2.4.1 | LR_111_Rsphaeroides | SRA009378 | SRP001079 | SRX111329 | SRR389120 | 09012011_8cell.A01.1 |
| Rhodobacter sphaeroides 2.4.1 | LR_111_Rsphaeroides | SRA009378 | SRP001079 | SRX111329 | SRR389121 | 09012011_8cell.A01.2 |
| Rhodobacter sphaeroides 2.4.1 | LR_111_Rsphaeroides | SRA009378 | SRP001079 | SRX111329 | SRR389116 | 09012011_8cell.A01.2 |
| Rhodobacter sphaeroides 2.4.1 | LR_111_Rsphaeroides | SRA009378 | SRP001079 | SRX111329 | SRR389112 | 09012011_8cell.A01.3 |
| Rhodobacter sphaeroides 2.4.1 | LR_111_Rsphaeroides | SRA009378 | SRP001079 | SRX111329 | SRR389114 | 09012011_8cell.A01.3 |
| Rhodobacter sphaeroides 2.4.1 | LR_111_Rsphaeroides | SRA009378 | SRP001079 | SRX111329 | SRR389124 | 09012011_8cell.A01.4 |
| Rhodobacter sphaeroides 2.4.1 | LR_111_Rsphaeroides | SRA009378 | SRP001079 | SRX111329 | SRR389122 | 09012011_8cell.A01.4 |
| Rhodobacter sphaeroides 2.4.1 | LR_111_Rsphaeroides | SRA009378 | SRP001079 | SRX111329 | SRR389111 | 09012011_8cell.A01.5 |
| Rhodobacter sphaeroides 2.4.1 | LR_111_Rsphaeroides | SRA009378 | SRP001079 | SRX111329 | SRR389117 | 09012011_8cell.A01.5 |
| Rhodobacter sphaeroides 2.4.1 | LR_111_Rsphaeroides | SRA009378 | SRP001079 | SRX111329 | SRR389118 | 09012011_8cell.A01.6 |
| Rhodobacter sphaeroides 2.4.1 | LR_111_Rsphaeroides | SRA009378 | SRP001079 | SRX111329 | SRR389123 | 09012011_8cell.A01.6 |
| Rhodobacter sphaeroides 2.4.1 | LR_111_Rsphaeroides | SRA009378 | SRP001079 | SRX111329 | SRR389110 | 09012011_8cell.A01.7 |
| Rhodobacter sphaeroides 2.4.1 | LR_111_Rsphaeroides | SRA009378 | SRP001079 | SRX111329 | SRR389115 | 09012011_8cell.A01.7 |
| Rhodobacter sphaeroides 2.4.1 | LR_111_Rsphaeroides | SRA009378 | SRP001079 | SRX111329 | SRR389119 | 09012011_8cell.A01.8 |
| Rhodobacter sphaeroides 2.4.1 | LR_111_Rsphaeroides | SRA009378 | SRP001079 | SRX111329 | SRR389113 | 09012011_8cell.A01.8 |
| Scardovia wiggsiae F0424 | LR_106_Swiggsiae | SRA038463 | SRP007231 | SRX109875 | SRR386377 | 08232011_8cell.C01.2 |
| Scardovia wiggsiae F0424 | LR_106_Swiggsiae | SRA038463 | SRP007231 | SRX109875 | SRR386401 | 08232011_8cell.C01.2 |
| Scardovia wiggsiae F0424 | LR_106_Swiggsiae | SRA038463 | SRP007231 | SRX109875 | SRR386488 | 08232011_8cell.C01.3 |
| Scardovia wiggsiae F0424 | LR_106_Swiggsiae | SRA038463 | SRP007231 | SRX109875 | SRR386438 | 08232011_8cell.C01.3 |
| Scardovia wiggsiae F0424 | LR_106_Swiggsiae | SRA038463 | SRP007231 | SRX109875 | SRR386418 | 08232011_8cell.D01.1 |
| Scardovia wiggsiae F0424 | LR_106_Swiggsiae | SRA038463 | SRP007231 | SRX109875 | SRR386386 | 08232011_8cell.D01.1 |
| Scardovia wiggsiae F0424 | LR_106_Swiggsiae | SRA038463 | SRP007231 | SRX109875 | SRR386412 | 08232011_8cell.D01.2 |
| Scardovia wiggsiae F0424 | LR_106_Swiggsiae | SRA038463 | SRP007231 | SRX109875 | SRR386484 | 08232011_8cell.D01.2 |
| Scardovia wiggsiae F0424 | LR_106_Swiggsiae | SRA038463 | SRP007231 | SRX109875 | SRR386427 | 08232011_8cell.D01.3 |
| Scardovia wiggsiae F0424 | LR_106_Swiggsiae | SRA038463 | SRP007231 | SRX109875 | SRR386417 | 08232011_8cell.D01.3 |
| Scardovia wiggsiae F0424 | LR_106_Swiggsiae | SRA038463 | SRP007231 | SRX109878 | SRR386381 | 09062011_2cell_2.C01.1 |
| Scardovia wiggsiae F0424 | LR_106_Swiggsiae | SRA038463 | SRP007231 | SRX109878 | SRR386403 | 09062011_2cell_2.C01.1 |
| Scardovia wiggsiae F0424 | LR_106_Swiggsiae | SRA038463 | SRP007231 | SRX109878 | SRR386426 | 09062011_2cell_2.C01.2 |
| Scardovia wiggsiae F0424 | LR_106_Swiggsiae | SRA038463 | SRP007231 | SRX109878 | SRR386393 | 09062011_2cell_2.C01.2 |
| Scardovia wiggsiae F0424 | LR_106_Swiggsiae | SRA038463 | SRP007231 | SRX109882 | SRR386456 | 09072011_8cell.B01.1 |
| Scardovia wiggsiae F0424 | LR_106_Swiggsiae | SRA038463 | SRP007231 | SRX109882 | SRR386424 | 09072011_8cell.B01.1 |
| Scardovia wiggsiae F0424 | LR_106_Swiggsiae | SRA038463 | SRP007231 | SRX109882 | SRR386400 | 09072011_8cell.B01.2 |
| Scardovia wiggsiae F0424 | LR_106_Swiggsiae | SRA038463 | SRP007231 | SRX109882 | SRR386454 | 09072011_8cell.B01.2 |
| Streptococcus pneumoniae Tigr4 | LR_59_Spneumonaie | SRA048045 | SRP009303 | SRX109959 | SRR386790 | 02232011_AM_6cell.B01.1 |
| Streptococcus pneumoniae Tigr4 | LR_59_Spneumonaie | SRA048045 | SRP009303 | SRX109959 | SRR386793 | 02232011_AM_6cell.B01.1 |
| Streptococcus pneumoniae Tigr4 | LR_59_Spneumonaie | SRA048045 | SRP009303 | SRX109959 | SRR386796 | 02232011_AM_6cell.B01.2 |
| Streptococcus pneumoniae Tigr4 | LR_59_Spneumonaie | SRA048045 | SRP009303 | SRX109959 | SRR386797 | 02232011_AM_6cell.B01.2 |
| Streptococcus pneumoniae Tigr4 | LR_59_Spneumonaie | SRA048045 | SRP009303 | SRX109959 | SRR386798 | 02232011_AM_6cell.B01.3 |
| Streptococcus pneumoniae Tigr4 | LR_59_Spneumonaie | SRA048045 | SRP009303 | SRX109959 | SRR386788 | 02232011_AM_6cell.B01.3 |
| Streptococcus pneumoniae Tigr4 | LR_59_Spnuemoniae | SRA048045 | SRP009303 | SRX109958 | SRR386785 | 05022011_8cell.A01.1 |
| Streptococcus pneumoniae Tigr4 | LR_59_Spnuemoniae | SRA048045 | SRP009303 | SRX109958 | SRR386795 | 05022011_8cell.A01.1 |
| Streptococcus pneumoniae Tigr4 | LR_59_Spnuemoniae | SRA048045 | SRP009303 | SRX109958 | SRR386787 | 05022011_8cell.A01.2 |
| Streptococcus pneumoniae Tigr4 | LR_59_Spnuemoniae | SRA048045 | SRP009303 | SRX109958 | SRR386783 | 05022011_8cell.A01.2 |
| Streptococcus pneumoniae Tigr4 | LR_59_Spnuemoniae | SRA048045 | SRP009303 | SRX109958 | SRR386784 | 05022011_8cell.A01.3 |
| Streptococcus pneumoniae Tigr4 | LR_59_Spnuemoniae | SRA048045 | SRP009303 | SRX109958 | SRR386794 | 05022011_8cell.A01.3 |
| Streptococcus pneumoniae Tigr4 | LR_59_Spnuemoniae | SRA048045 | SRP009303 | SRX109958 | SRR386789 | 05022011_8cell.A01.4 |
| Streptococcus pneumoniae Tigr4 | LR_59_Spnuemoniae | SRA048045 | SRP009303 | SRX109958 | SRR386786 | 05022011_8cell.A01.4 |
| Streptococcus pneumoniae Tigr4 | LR_59_Spnuemoniae | SRA048045 | SRP009303 | SRX109958 | SRR386791 | 05022011_8cell.A01.5 |
| Streptococcus pneumoniae Tigr4 | LR_59_Spnuemoniae | SRA048045 | SRP009303 | SRX109958 | SRR386792 | 05022011_8cell.A01.5 |

**Supplemental Table 6**. Accession information for Pacific Biosciences data. Organism: organism name including strain. Library: internal library identifier. Submission Accession: NCBI Short Read Archive submission accession number. Study Accession: NCBI Short Read Archive study accession number. Experiment Accession: NCBI Short Read Archive experiment accession number. Run Accession: NCBI Short Read Archive run accession number. Receptacle Barcode: internal Pacific Biosciences SMRT Cell identifier.
